1 The Exposome and its Associations with Broad Mental and Physical Health Measures in Early  
2 Adolescence

3 Tyler M. Moore <sup>a,b</sup>, Elina Visoki <sup>b</sup>, Stirling T. Argabright <sup>b</sup>, Grace E. DiDomenico <sup>b</sup>,  
4 Ingrid Sotelo <sup>b</sup>, Jeremy D. Wortzel <sup>b</sup>, Areebah Naeem <sup>b</sup>, Ruben C. Gur <sup>a,b</sup>, Raquel E. Gur <sup>a,b</sup>,  
5 Varun Warriar <sup>c</sup>, Sinan Guloksuz <sup>d,e</sup>, Ran Barzilay <sup>a,b,f,\*</sup>

6 Running head: Early adolescence exposome and health

7  
8 <sup>a</sup> Department of Psychiatry, Perelman School of Medicine, University of Pennsylvania,  
9 Philadelphia, USA

10  
11 <sup>b</sup> Lifespan Brain Institute of the Children’s Hospital of Philadelphia (CHOP) and Penn Medicine,  
12 Philadelphia, USA

13  
14 <sup>c</sup> Autism Research Centre, Department of Psychiatry, University of Cambridge, Cambridgeshire,  
15 UK

16  
17 <sup>d</sup> Department of Psychiatry, Yale University School of Medicine, New Haven CT, USA

18  
19 <sup>e</sup> Department of Psychiatry and Neuropsychology, School for Mental Health and Neuroscience,  
20 Maastricht University Medical Centre, Maastricht, The Netherlands

21  
22 <sup>f</sup> Department of Child and Adolescent Psychiatry and Behavioral Science, CHOP, Philadelphia,  
23 USA

24  
25 Current word count (Introduction, Results and Discussion) = 5,755

26 References: 97

27 Online Methods: 3,636

28 This work was supported by NIMH grants K23MH120437 (RB) and R01MH117014 (RCG,  
29 TMM).

30 \*Correspondence concerning this article should be addressed to Ran Barzilay, Perelman School  
31 of Medicine, University of Pennsylvania, 3400 Spruce St. – 10<sup>th</sup> Floor Gates Pavilion,  
32 Philadelphia, PA 19104. E-mail: [ran.barzilay@penncmedicine.upenn.edu](mailto:ran.barzilay@penncmedicine.upenn.edu)

33

34 **Abstract**

35 Exposures to perinatal, familial, social, and physical environmental stimuli can have substantial  
36 effects on human development. Yet the complex network structure of the environment (i.e.,  
37 exposome) makes it challenging to investigate. Here, we analyze the exposome using data from  
38 the Adolescent Brain Cognitive Development Study (ABCD, N = 11,235, mean age = 10.9, 52%  
39 male) and replicate key findings in an age and sex matched sample from the Philadelphia  
40 Neurodevelopmental Cohort (PNC, N = 4,993). Both these cohorts are large, diverse samples of  
41 US adolescents with phenotyping at multiple levels of environmental exposure. In ABCD,  
42 applying data-driven iterative factor analyses and bifactor modeling, we reduced dimensionality  
43 from n=798 exposures to six exposome subfactors and a general (adverse) exposome factor.  
44 These factors revealed quantitative differences among racial and ethnic groups. Exposome  
45 factors increased variance explained in mental health by 10-fold (from <4% to >38%), over and  
46 above other commonly used sociodemographic factors. The general exposome factor was  
47 associated with psychopathology ( $\beta=0.28$ , 95%CI 0.26-0.3) and key health-related outcomes:  
48 obesity (OR=1.4, 95%CI 1.3-1.5) and advanced pubertal development (OR=1.3, 95%CI 1.2-1.5).  
49 In PNC, using substantially fewer available environmental exposures (n=29), analyses yielded  
50 consistent associations of the general exposome factor with psychopathology ( $\beta =0.15$ , 95%CI  
51 0.13-0.17), obesity (OR=1.4, 95%CI 1.3-1.6) and advanced pubertal development (OR=1.3,  
52 95%CI 1-1.6). Findings demonstrate how incorporating the exposome framework can be useful  
53 to study the role of environment in human development.

54

55

56

57

58 **E**nvironment (E) is a key driver of variability in human development<sup>4</sup>, with extensive  
59 literature linking environment to general<sup>2</sup> and mental health<sup>3</sup>. Childhood environment is  
60 especially important for development, with evidence that exposures occurring during sensitive  
61 periods of development are critical for later life health outcomes in both animals<sup>3</sup> and humans<sup>4</sup>.  
62 Therefore, there is a clear need to characterize environment in a systematic and comprehensive  
63 manner early in the lifespan to advance our understanding of its role in human development.

64 Three major challenges in studying environment's associations with health and disease  
65 are notable. First, exposures are often co-occurring and collinear<sup>5</sup>, and it is difficult to  
66 disentangle specific effects because they are intertwined in a complex, dynamic network<sup>6</sup>. For  
67 example, when studying exposure to trauma, one should consider its correlation with, for  
68 example, poverty, neighborhood environment, and familial factors<sup>7</sup>. Thus, it is difficult to dissect  
69 specificity in relationships between single exposure types (e.g., trauma) and developmental  
70 outcomes. Second, exposures are not isolated and are likely to interact both among themselves  
71 (ExE) and with genetics (G) (GxE) to drive developmental outcomes, as proposed in various  
72 developmental models (e.g., “stress-diathesis”<sup>8</sup>, “stress inoculation”<sup>9</sup>, “developmental origins of  
73 health and disease”<sup>10</sup>). Finally, for complex conditions it is exceptionally difficult to clearly  
74 separate exposures into genetic and environmental influences as the environment is reflected in  
75 genetic association studies and genetics shape our environment<sup>11–15</sup>. Hence, categorizing  
76 variables as purely biological or environmental is impossible.

77 Specifically for the first challenge of collinearity, the exposome paradigm is one  
78 framework that may advance the study of environment<sup>16</sup>. The exposome (see Wild 2005<sup>17</sup>)  
79 represents the totality of environmental exposures that an individual experiences from  
80 conception throughout the lifespan<sup>18,19</sup>, as well as the interaction among these exposures<sup>6</sup>.

81 Though early studies of the association between exposome and health were focused on physical  
82 exposures (e.g., chemical carcinogens) on cancer risk<sup>20</sup>, the concept has been extended to include  
83 environmental exposures at a broader context including socioeconomic and lifestyle factors<sup>21</sup>.  
84 More recently, the exposome framework has been applied in psychiatry<sup>22</sup>, with evidence of  
85 exposome effects in both psychosis<sup>23,24</sup> and suicide research<sup>25</sup>.

86 While associations of specific environmental exposures and development have long been  
87 studied<sup>26</sup>, there is a need for an integrative approach that can leverage environmental exposures'  
88 data to generate measures that will capture the main components of the exposome  
89 comprehensively, test its relationship with health measures, and facilitate integration of  
90 exposome measures in studies of human development. Specifically, there is a gap in large-scale  
91 studies on the association between the exposome and child and adolescent development. The  
92 availability of rich data on many levels of environmental exposures in youth cohorts provides an  
93 opportunity to address this gap. Here, we apply an exposome framework analysis in two youth  
94 datasets - The Adolescent Brain and Cognitive Development (ABCD) Study<sup>27</sup> and the  
95 Philadelphia Neurodevelopmental Cohort (PNC)<sup>28</sup>.

96 The ABCD follows a large, diverse cohort of children (N=11,878, recruited at age 9-10)  
97 ascertained through school systems and spanning almost the entire geographic United States,  
98 including both urban and rural settings<sup>27</sup>. ABCD Study protocol collected data on environment at  
99 multiple levels of exposure including household, family, school, neighborhood, and state-level<sup>29</sup>.  
100 Several hypothesis-driven studies have examined specific ABCD exposures' effects on brain and  
101 behavior outcomes (e.g., trauma<sup>30</sup>, neighborhood poverty<sup>31</sup>, air pollution<sup>32</sup>, prenatal cannabis  
102 exposure<sup>33</sup>, screen time<sup>34</sup>, family factors<sup>35</sup>). In the current work, we employed an exposome  
103 framework approach that systematically investigates multiple environmental exposures. We used

104 data from the 1-year follow-up ABCD Study assessment (N=11,235, see **Supplemental Table 1**  
105 for demographics), which included youth- and parent-report of children's exposures and census-  
106 level data<sup>29</sup>. We conducted a series of factor analyses to reduce the dimensionality of the data and  
107 generate exposome factor scores. Additionally, we aimed to test the external validity of our  
108 exposome conceptual framework using an independent age and gender matched sample  
109 (N=4,993) of American youth from the PNC<sup>28</sup>. While PNC was less focused on environment  
110 compared to ABCD and did not collect data on school and family dynamics, it still included a  
111 few measures on environmental exposures (e.g., trauma<sup>36,37</sup>, neighborhood level socioeconomic  
112 factors<sup>38</sup>) based on youth and parent report and geocoded census-level data, allowing us to apply  
113 an exposome approach analyses in PNC in an attempt to generalize findings obtained in ABCD.

114 In view of the exposome paradigm that multiple environmental exposures are associated  
115 with the variability in health outcomes, we aimed to (i) comprehensively and systematically  
116 characterize the exposome (i.e., the combined effect of exposures at multiple levels of analysis)  
117 of early-adolescents in the US using two youth cohorts; (ii) generate exposome scores that  
118 represent environment and can be used for downstream analyses; and (iii) test exposome's  
119 associations with mental health and indicators of general health, over and above commonly used  
120 proxies of socioeconomic environment (parent education and household income). For general  
121 health outcomes, we focused on obesity, a key risk factor for later lifespan morbidity<sup>39</sup>, and  
122 pubertal development, considering studies linking earlier puberty with poorer health outcomes<sup>40</sup>.

123 **Figure 1** depicts the overall study design.

124

125

[INSERT **Figure 1** HERE]

126

127 **Results**

128 *Dimensionality reduction of the exposome in the ABCD Study*

129 We identified a comprehensive set of environmental exposures in the ABCD Study (798  
130 variables, **Supplemental Table 2**). In line with our goal to comprehensively assess environment,  
131 and the conceptual exposome framework that multiple exposures combine to explain variance in  
132 health outcomes, and because genetics and environment inform and interact with each other, we  
133 applied a permissive definition of environment using all available data on environment as  
134 collected by multiple sources (i.e., youth-reported, parent-reported, and census derived  
135 environmental variables). For example, since parental factors play a major role in childhood  
136 development, we included parental psychopathology in our analyses, even though we  
137 acknowledge that genetic contributions of parental psychopathology also exist in the child.  
138 Furthermore, because we wanted to investigate the utility of applying an exposome framework,  
139 we excluded two pivotal measures commonly used to estimate environment, including in  
140 previous ABCD Study research: household income<sup>41,42</sup> and parental education<sup>43</sup>. This choice  
141 allowed us (1) to test the “added value” of the exposome scores to explain variance in health  
142 outcomes over and above commonly used proxies of environment known to associate with  
143 developmental outcomes<sup>44</sup>, including in ABCD Study<sup>42</sup>; and (2) to validate the exposome scores  
144 using “classic” indicators of socioeconomic environment.

145 From the 798 identified environmental variables, we decided on features for which to use  
146 ABCD summary measures (e.g., family conflict; see detailed description of variable choice in  
147 **Methods**), resulting in 348 variables for analysis. Then, we applied a set of exploratory factor  
148 analyses (EFAs) to identify correlation-based clustering among variables and allow further  
149 reduction of variable number. **Supplemental Figure 1** provides a schematic presentation of this

150 dimensionality reduction process, which is described in full in **Methods**. Briefly, we started by  
151 including all 348 variables in analysis and, using nine EFAs, iteratively reduced these to 96 with  
152 minimal redundancy. Each of the EFAs described above included items from subdomains of  
153 environmental exposures, including parental mental health and drug use (**Supplemental Table**  
154 **3**), maternal substance use during pregnancy (**Supplemental Table 4**), neighborhood-level  
155 characteristics (**Supplemental Table 5**), household-level poverty and religiosity (**Supplemental**  
156 **Table 6**), school-level characteristics (**Supplemental Table 7**), pregnancy complications  
157 (**Supplemental Table 8**), birth complications (**Supplemental Table 9**), parent-report of  
158 childhood traumatic events (**Supplemental Table 10**), and youth-report of life events  
159 (**Supplemental Table 11**).

160 **Table 1** shows the results of the final EFA of the minimally redundant 96 environmental  
161 variables, using iterated target rotation (ITR) designed to detect complex structure (cross-  
162 loadings), which revealed six factors. *Factor 1* comprises variables most related to *household*  
163 *adversity*, based primarily on parent-report, with the strongest indicators being the mother’s use  
164 of tobacco or marijuana during pregnancy, parental alcohol-related problems affecting ability to  
165 hold a job or stay out of jail, and frequent adult conflict in the house. *Factor 2* comprises  
166 variables most related to *neighborhood environment*, based primarily on geocoded address, with  
167 the strongest indicators being census-derived measures of neighborhood poverty and population  
168 density. *Factor 3* comprises variables most related to youth-reported *day-to-day experiences*,  
169 both positive (e.g., feeling “involved at” and enjoying school, acceptance by caregivers) and  
170 negative (e.g., experiences of discrimination, family conflict). *Factor 4* comprises variables  
171 most related to *state environment* (i.e., environmental factors from the state-level), with the  
172 strongest indicators being negative attitudes toward persons with non-hetero sexual orientation,

173 traditional views about the roles of women, and less permissive marijuana laws. Note that a  
174 “ruralness” aspect of *Factor 4* is evident in the low neighborhood wealth and property values  
175 (seventh indicator from top). *Factor 5* comprises variables most related to *family values*, with  
176 the strongest indicators being the strictness of rules related to alcohol, tobacco, and marijuana, as  
177 well as various indicators that tap importance of religion and family cohesiveness. *Factor 6*  
178 includes variables most related to *pregnancy and birth complications*, with the strongest  
179 indicator being premature birth. Of note, prenatal exposure to substances did not load on *Factor*  
180 *6*, but rather on *Factor 1* which taps household adversity. This configuration was used because it  
181 indicates that maternal substance use is more revealing of household adversity than of pregnancy  
182 or birth complications. Inclusion of maternal substance use in *Factor 6* would, paradoxically,  
183 increase the ambiguity of that factor.

184

185 [INSERT **Table 1** HERE]

186

187 We then conducted a quasi-confirmatory factor analysis (CFA) model that included 65  
188 items, selected from the 96 variables based on their loadings in the EFA (“quasi-” because there  
189 is no cross-validation being performed here; the “confirmatory” model is actually being used to  
190 estimate a model for score creation rather than truly confirm a theoretical or empirically-derived  
191 model)<sup>45</sup>. A notable reason a quasi-confirmatory approach was used here is that exploratory  
192 bifactor rotations still need further development<sup>46</sup>. The commonly used Schmid-Leiman  
193 performs well, but it is not a true bifactor<sup>47</sup>. Others have not been well-tested for the use of  
194 score-creation<sup>48,49</sup>. The quasi-CFA approach allows one to stay as close as possible to a true  
195 bifactor (albeit here with cross-loadings) to take advantage of its lack of proportionality



196 constraints (as in the Schmid). This lower parsimony of a true bifactor allows one to estimate  
197 especially precise sub-factor scores<sup>50</sup>.

198       Items with absolute value less than 0.30 in the ITR-rotated EFA (**Table 1**) were removed  
199 for the final CFA analysis used for creation of exposome scores. These selected 65 items inform  
200 the resultant general exposome factor and were derived from multiple scales of the ABCD Study,  
201 from both parent- and youth-report and from census-derived measures.

202

### 203 *Generation of exposome scores in ABCD Study*

204       To estimate a general exposome factor (*Exp-factor*) score and orthogonal exposome  
205 subfactor scores that allow delineation of discrete environmental effects on development, we  
206 applied a bifactor modeling approach<sup>51</sup>. **Figure 2** shows the results of the quasi-confirmatory  
207 bifactor analysis with the loadings of the strongest items and their direction (see full list of item  
208 loadings in **Supplemental Table 12**). Fit of the model was acceptable<sup>52,53</sup>, with a root mean-  
209 square error of approximation (RSMEA) of 0.033 and standardized root mean-square residual  
210 (SRMR) of 0.060; confidence intervals around the RMSEA were imperceptibly narrow at this  
211 sample size. Note that the comparative fit index (CFI) of 0.85 was below the acceptable range,  
212 conflicting with other fit indices, which is a known phenomenon in large models<sup>54</sup> and likely  
213 does not indicate poor fit<sup>55</sup>. Here, it was possible to achieve a CFI > 0.90 *post hoc* by allowing  
214 some residuals to correlate, but we opted to leave the model “pure” rather than use modification  
215 indices<sup>56</sup> merely to increase one fit index. Thus, the *Exp-factor* captures the broad,  
216 multidimensional environmental phenotyping of the ABCD assessment. Notably, extreme  
217 household poverty, parental legal trouble, unplanned pregnancy, physical conflict among adults  
218 in the household, neighborhood poverty, and experiences of discrimination were among the

219 strongest loading items of the *Exp-factor*. Also, of note, in the EFA model (**Table 1**),  
220 experiences of discrimination loaded strongly on the *day-to-day experiences factor*, but in the  
221 bifactor model (**Figure 2; Supplemental Table 12**), variance explained in the discrimination  
222 items “shifted” from *day-to-day experiences* to the *Exp-factor*. Thus, in the final model, most  
223 discrimination is accounted for by the *Exp-factor* score. The *day-to-day experiences* subfactor is  
224 left without discrimination and is heavily influenced by attitudes toward school, a center-point of  
225 life in this age range.

226

227 [INSERT **Figure 2** HERE]

228

229 *The exposome across sociodemographic groups in ABCD Study*

230 Next, we tested the associations of the *Exp-factor* and the six exposome subfactor scores  
231 with key sample demographics. **Figure 3** shows comparisons of the exposome scores across sex,  
232 household income, parental education, race, and ethnicity. Sex differences did not emerge in the  
233 *Exp-factor* or in five of the six subfactors; the only difference was that males had greater *day-to-*  
234 *day experiences* scores (Cohen’  $d=0.30$ ,  $P<.001$ ), which is driven by the fact that males report  
235 disliking school more often than females do. Comparison of high to low parent education and  
236 household income revealed expected differences, whereby both were associated with greater  
237 *Exp-factor* score with very large effect sizes (for income,  $d=1.40$ ; for parent education,  $d=1.16$ ,  
238  $P’s<0.001$ ), and greater *neighborhood environment* (poverty) scores with medium effect size (for  
239 income,  $d=0.63$ ; for parent education,  $d=0.41$ ,  $P’s<0.001$ ). Comparison of high/low parent  
240 education and income of other exposome factors including *household adversity*, *family values*,  
241 and *state environment* revealed differences in the small effect size range ( $d’s$  ranging from 0.10-

242 0.22, all  $P$ 's<0.001). Notably, comparing high/low income and parent education revealed either  
243 very small ( $d$ 's<0.09), or non-significant differences in the *day-to-day experiences* subfactor and  
244 the *pregnancy/birth complications* subfactor (**Figure 3**).

245 Comparison of the *Exp-factor* score across races and ethnicities revealed substantial  
246 differences. Black participants (n=2,269) had greater *Exp-factor* scores than non-Black  
247 participants (n=8,966) in the very large effect size range ( $d=1.28$ ,  $P<0.001$ ); Hispanic  
248 participants (n=2,226) also showed greater *Exp-factor* scores than non-Hispanic participants  
249 (n=8,872), but with a smaller effect size ( $d=0.29$ ,  $P<0.001$ ). Notably, Asian participants (n=723)  
250 had lower *Exp-factor* scores than non-Asian participants (n=10,512), with a medium to large  
251 effect size ( $d=0.66$ ,  $P<0.001$ ). Comparisons of exposome subfactors across races and ethnicities  
252 showed that the only difference with a large effect size was observed in Hispanic participants,  
253 who had a greater *neighborhood environment* subfactor score (representing greater population  
254 density and, to a lesser extent, poverty) ( $d=0.92$ ,  $P<0.001$ ). Similarly, Black and Asian  
255 participants showed greater *neighborhood environment* subfactor scores, but with smaller effect  
256 sizes (for Black,  $d=0.41$ ; for Asian,  $d=0.28$ ,  $P$ 's<0.001). Comparison of the *state environment*  
257 subfactor revealed differences among races and ethnicity at the small to moderate effect size  
258 range ( $d$ 's ranging from 0.25-0.43). Differences in *family values* subfactor scores were observed  
259 among Black and Hispanic, but not Asian participants, who were the only group that showed  
260 differences in the *birth/pregnancy complications* subfactor, with lower scores. Notably, no  
261 differences were observed in *day-to-day experiences* (largely determined by attitudes toward  
262 school) when comparing across races and ethnicities. (**Figure 3**).

263

264

[INSERT **Figure 3** HERE]

265

266 *Association of exposome scores with mental health in ABCD Study*

267 We next sought to use exposome factor scores to explain variance in participant mental  
268 health. First, we calculated a single general factor score that represents the overall liability to  
269 psychopathology (*P-factor*)<sup>57,58</sup>, which was consistently shown to accurately represent  
270 psychopathology in youth samples<sup>59</sup>. Then, we used the exposome scores as independent  
271 variables to test their contribution to explaining variance in *P-factor* (dependent variable). We  
272 found that while age, sex, race, ethnicity, household income and parent education explained <4%  
273 of the variance in *P-factor* score, the addition of the exposome factors increased the variance  
274 explained ~10 fold to 38.2% (**Table 2**). Among the exposome factors, *day-to-day experiences*  
275 showed the greatest association with *P-factor* score (Standardized Beta=0.516, P<0.001),  
276 followed by the *Exp-factor* (Standardized Beta=0.276, P<0.001). Other exposome subfactors  
277 were also significantly associated with *P-factor* score, but with relatively modest effect sizes (all  
278 betas<0.09, all P's<0.025). The single subfactor not associated with *P-factor* score was  
279 *pregnancy/birth complications* (P=0.075).

280

281 [INSERT **Table 2** HERE]

282

283 *Association of exposome scores with youth obesity and pubertal development in ABCD Study*

284 Lastly, we tested whether exposome scores are associated with general adolescent-health  
285 indicators that are important for health later in the lifespan: obesity<sup>39</sup> and pubertal development<sup>40</sup>,  
286 which are both influenced by the environment<sup>60,61</sup>. Overall, 1,871 (16.7%) in the cohort were  
287 obese based on U.S. Centers for Disease Control (CDC) definitions (body mass index

288 [BMI]>95<sup>th</sup> percentile)<sup>62</sup>. 727 youths (6.5% of sample, n=104 males [1.7% of males], n=623  
289 females [11.5% of females]) were late/post-pubertal (4/5 on a 5-point Likert scale). The *Exp-*  
290 *factor* was significantly associated with obesity and with late/post-pubertal stage (odds ratio  
291 [OR]=1.41, 95%CI=1.31-1.52; OR=1.30 95%CI=1.16-1.47, respectively, P's<0.001; **Figure 4**  
292 and **Supplemental Tables 13-14**, models co-varied for demographics, household income, and  
293 parental education, and BMI in the puberty model). No exposome subfactors were associated  
294 with obesity. The *day-to-day experiences* subfactor was the only one significantly associated  
295 with late/post-pubertal developmental stage (OR=1.31, 95%CI=1.19-1.43, P<0.001).

296

297 [INSERT **Figure 4** HERE]

298

299 *Generalization of the exposome framework in the Philadelphia Neurodevelopmental Cohort*  
300 *(PNC)*

301 *Generation of exposome scores in PNC*

302 To test the generalizability of the exposome framework outside of the ABCD Study, we  
303 employed a confirmatory analytic approach in an independent US youth dataset – the PNC,  
304 which was sampled between 2009-2011<sup>28</sup>, more than 5 years before the onset of the ABCD  
305 Study. Notably, PNC was ascertained through a hospital network (Children’s Hospital of  
306 Philadelphia) and not school networks as in the ABCD Study. We age-matched the PNC  
307 generalization sample through limiting the age of PNC participants to under 14 years (the entire  
308 sample ranged from 8-21 years), resulting in a total of N=4,993 participants with a mean age of  
309 10.9 years, like the ABCD Study sample. Except for age and similar gender distribution, the  
310 PNC sample displayed notable differences compared to the ABCD Study sample, including a

311 greater proportion of Black participants (31.6% in PNC vs. 20.2% in ABCD) and a smaller  
312 proportion of Hispanic youths (7.3% in PNC vs. 20.1% in ABCD). Notably, PNC was a single  
313 site study (compared to 21 sites in ABCD). **Supplemental Table 15** details demographic  
314 characteristics of the generalization cohort and the corresponding measures in the ABCD Study.

315 For the PNC exposome analysis, we identified all available environmental exposures in  
316 the PNC (n=29 variables) and performed a bifactor confirmatory factor analysis of the exposures,  
317 with the goal of obtaining acceptable model fit. Indeed, fit of the model was acceptable<sup>52,53</sup>, with  
318 a RSMEA of 0.036±0.001, SRMR of 0.068, and CFI of 0.94. This confirmed one portion of the  
319 exploratory ABCD analysis (also a bifactor model), but it also allowed us to generate orthogonal  
320 scores from the PNC model, including a “general exposome” score (as done in the ABCD  
321 sample). Notably, the generation of a PNC general exposome score allows one to test  
322 associations with mental and general health measures in the attempt to replicate findings from  
323 ABCD Study, despite that PNC had much “leaner” characterization of environment compared to  
324 ABCD Study (n=29 variables in PNC compared to n=798 variables in ABCD Study, with no  
325 data on school and family dynamics in PNC). As seen in **Supplemental Figure 2**, exposome  
326 factor analysis of all 29 environmental factors included four factors. *Factor 1* comprises  
327 variables that are broadly related to *household adversity* and include first degree family history  
328 of mental health issues and parental separation/divorce. *Factor 2* comprises variables most  
329 related to *neighborhood environment*, informed by census-derived measures. *Factor 3* comprises  
330 variables related to *trauma exposure*. *Factor 4* comprises two variables most related to *early life*,  
331 including birth complications and lead exposure. **Supplemental Table 16** details the  
332 environmental exposures in PNC and the loading on the exposome factors obtained from the  
333 confirmatory factor analysis.

334  
335  
336  
337  
338  
339  
340  
341  
342  
343  
344  
345  
346  
347  
348  
349  
350  
351  
352  
353  
354  
355  
356

*Association of exposome scores with mental health, obesity and pubertal development in PNC*

We then tested the capacity of PNC exposome factors in explaining variance in health using similar measures as in ABCD. For mental health, we used the *P-factor* (as in ABCD) that we had previously calculated based on the clinical assessment of PNC<sup>63,64</sup>. For general health measures, we used obesity and being at a more advanced pubertal developmental stage (late/post puberty), as in the ABCD analyses.

Consistent with the ABCD analyses, we found that the addition of the exposome factors substantially increased the variance explained (adjusted  $R^2$ ) in the P-factor, from <4% (when relying on demographics alone) to 18.4%, with the *Exp-factor* similarly associated with the P-factor, though at a smaller effect size than in ABCD (Standardized Beta=0.15, 95% CI 0.26-0.3,  $P<0.001$  in PNC vs. Standardized Beta=0.285 in ABCD, see **Table 3** for full model statistics). In the general health measures, similar to the main analyses in ABCD, the *Exp-factor* was significantly associated with obesity (OR=1.43, 95% CI=1.27-1.61,  $P<0.001$  in PNC vs. OR=1.41 in ABCD); and with advanced pubertal development (estimated by scoring 4/5 on a 5 Likert scale of pubertal development, OR=1.26, 95% CI=1-1.59,  $P=0.047$  in PNC vs. OR=1.3 in ABCD, **Figure 5** and **Supplemental Tables 17-18**).

[INSERT **Table 3** HERE]

[INSERT **Figure 5** HERE]

357

358 *Sensitivity Analyses*

359         We conducted multiple sensitivity analyses in ABCD to assess robustness of the main  
360 findings. We first aimed to test whether the association of exposome factors with mental health  
361 depends on the measure used to model mental health. In the main analyses, we modeled mental  
362 health dimensionally using that the P-factor, which is a reliable measure of psychopathology in  
363 youth samples<sup>65,66</sup> that represents life course vulnerability to psychiatric disorders<sup>67</sup> and is  
364 predictive of long term psychiatric and functional outcomes<sup>68</sup>. In sensitivity analyses we tested  
365 associations of exposome factors with parent-reported child psychopathology available in ABCD  
366 (using the total child behavior checklist [CBCL] t-score). We found that similar to main  
367 analyses, addition of the exposome factors increased the explained variance by ~7 fold to 17.8%,  
368 compared to 2.5% in the model relying on demographics, household income, and parent  
369 education (**Supplemental Table 19**). In addition, we also tested association of exposome factor  
370 with more clinically interpretable binary diagnoses based on the ABCD clinical assessment:  
371 depression and attention deficit hyperactivity disorder (ADHD). We chose these two diagnoses  
372 as they represent disorders of both internalizing and externalizing symptomatology. Results  
373 showed that, similar to models using dimensional psychopathology, exposome factors are  
374 associated with both depression and ADHD (**Supplemental Table 20**).

375         In sensitivity analyses of the general health measures, we tested association of exposome  
376 factors with continuous measures of weight (BMI percentiles) and puberty (1-5 Likert scale),  
377 rather than binary measures as in main analyses. Results were similar in direction and statistical  
378 significance to the main analyses (**Supplemental Tables 21-22**).



379           In addition, we also conducted sensitivity analyses that accounted for potential site and  
380 family relatedness effects in ABCD. Because we wanted to evaluate environment based on  
381 factors that are included in the comprehensive exposome variable list (and not based on site), we  
382 did not account for ABCD Study sites in our main analyses. In sensitivity analyses we ran Mixed  
383 models testing the associations between exposome factors and mental health (P-factor and  
384 CBCL) and general health measures (BMI and pubertal development scale) accounting for site  
385 and family clustering. Results revealed similar findings as in main analyses (**Supplemental**  
386 **Tables 23-26**), except for the anticipated loss of statistical significance of the *state-level*  
387 *environment* exposome factor effects (that depends on site since the ABCD Study included 21  
388 sites from different states across the US). Notably, in the main analyses, clustering within site  
389 was intentionally not modeled because it was confounded with state-level variables. For  
390 example, if a state contained only one site, there would be no variability within that site on  
391 important state-level variables (e.g., cannabis legality). It is our working assumption that many  
392 of the quantitative ways that sites differ are accounted for by the state-level variables (indeed,  
393 that is their purpose).

394           Lastly, to maximize “harmonization” across ABCD and PNC datasets, we tested  
395 associations of exposome factors with P-factor, BMI, depression, ADHD, obesity and advanced  
396 pubertal status including identical co-variates that were available in both ABCD and PNC (age,  
397 sex, race, ethnicity, parental education). These analyses showed consistency across both youth  
398 cohorts (**Table 4**). Of note, in both studies, data were already collected, and analyses could not  
399 be truly harmonized, rather we tried to use similar measure as much as possible.

400

401

[INSERT **Table 4** HERE]

## 402 **Discussion**

403           We provide a comprehensive investigation of the exposome in early adolescence in the  
404 US in two separate large youth samples. We show that a data-driven approach allows integration  
405 of multiple exposures, resulting in dimensional factors representing different facets of the  
406 exposome, and that these factors explain variance in measures of early adolescent general and  
407 mental health. Our findings in ABCD Study, which was done in 21 sites across the US, allow for  
408 the appreciation of quantitative differences among American children’s environments across  
409 sociodemographic groups, which are associated with their trajectories of mental and physical  
410 development throughout the lifespan<sup>69,70</sup>. Notably, a major finding is that, within orthogonal  
411 exposome subfactors, significant items loaded from different measurement tools and levels of  
412 analysis (parent- and youth-report, individual-level exposures, and census-derived variables).  
413 This suggests that specific exposures within exposome factors likely represent a shared latent  
414 factor, highlighting the need to use a theoretical exposome framework when studying the  
415 relationship between environment and health<sup>16</sup>. Furthermore, bifactor modeling of the exposome  
416 revealed a general exposome adversity factor that was obtained independently in two separate  
417 cohorts, even though one cohort provided substantially more detailed environmental data than  
418 the other (n=798 exposures in ABCD and n=29 in PNC). This general exposome adversity factor  
419 integrates multiple exposures in addition to orthogonal exposome subfactors. While the current  
420 study analyzed cross-sectional data and cannot be used to infer causality, we suggest that our  
421 work provides a roadmap for dissection of environmental effects on developmental outcomes  
422 while accounting for the exposome’s complexity.

423           This research is important for several reasons. *First*, it demonstrates how inevitably  
424 collinear environmental exposures can be modeled when they are captured at multiple levels. For  
425 example, the *household adversity* subfactor in ABCD had strong loadings on youth-report of

426 parental trouble with the law, parental self-reported psychopathology, developmental history  
427 (capturing prenatal exposure to cannabis), and parent-report of poverty and whether pregnancy  
428 was planned. Therefore, when trying to dissect associations of specific exposures with  
429 developmental outcomes based on *a priori* knowledge and hypotheses in the ABCD Study, one  
430 should account for the collinearity that is likely to confound any relationship that a specific  
431 exposure may have with an index outcome of choice. *Second*, our results suggest that data-driven  
432 approaches to characterize the exposome may be important to reveal latent factors that cannot be  
433 identified with *a priori* knowledge. A key example is the prenatal exposure items in ABCD,  
434 from which items split between the *household adversity* subfactor (prenatal exposure to  
435 substances, planned pregnancy) and the *pregnancy/birth complications* subfactor. Notably,  
436 growing efforts try to link pre-/post-natal exposures in the ABCD Study with developmental  
437 outcomes (prenatal cannabis exposure<sup>33</sup>, breastfeeding<sup>71</sup> and other prenatal adversities<sup>72</sup>). Hence,  
438 it will become increasingly important to rigorously account for exposome complexity to allow  
439 generalizability and replicability of findings and identify causal mechanisms that are not  
440 confounded by collinear exposures. *Third*, in the context of understanding variance in  
441 psychopathology, our findings provide compelling evidence for the critical need to include  
442 environmental exposures when modeling psychopathology outcomes. We observed ~ 5- to 10-  
443 fold increase in  $R^2$  explaining dimensional psychopathology upon addition of exposome factors  
444 when using different psychopathology measures in two independent cohorts, over and above the  
445 commonly used estimators of socioeconomic environment (parent education and household  
446 income). Of note, while we could not test for causality in this work, we suggest that the inclusion  
447 of exposome scores in predictive models of psychopathology (where causality is not the focus),  
448 may improve their performance considerably. *Fourth*, our finding on exposome contribution to

449 variance in obesity and pubertal development in two independent samples provides a proof-of-  
450 concept for the utility of studying exposome effects on health trajectories in youth as they  
451 mature. *Fifth*, our ability to generalize the exposome framework and show that a general  
452 exposome factor can be calculated in an independent youth sample that is different in both its  
453 demographic characteristic and in its much leaner environmental phenotyping, may suggest that  
454 our findings have implications for modeling environmental effects in other developmental  
455 cohorts in the US and globally.

456         Previous research in other youth cohorts supports the notion that different exposures  
457 (e.g., trauma and neighborhood SES) and different mechanisms of environmental stress (threat  
458 vs. deprivation) are differentially associated with brain and behavior outcomes<sup>73</sup>, highlighting the  
459 need to address environmental complexity. For example, growing literature supports the notion  
460 that different exposures are associated with distinct brain structures and networks<sup>37,74</sup>. The deep  
461 phenotyping of multiple environmental facets in the ABCD Study creates unprecedented  
462 opportunities to specifically link environmental effects to brain and behavior development.  
463 Recent ABCD studies have provided proof-of-concept for brain-behavior-environment analyses  
464 that map neural parameters to multiple exposures<sup>75,76</sup>, and for the potential to use a subset of  
465 environmental risk factors to explain variance in mental health outcomes<sup>77</sup>. In addition, several  
466 studies have reported associations of specific exposures with cognition and neuroimaging  
467 parameters in ABCD data (e.g., household income<sup>42</sup>, neighborhood disadvantage<sup>78</sup>, lead  
468 exposure<sup>41</sup>). The studies mentioned above all used baseline ABCD data, which does not include  
469 key environmental exposures. The current study expands on previous works as we used 1-year  
470 follow-up data, which included youth-reported exposures (negative adverse life events and  
471 experiences of discrimination) not captured at baseline. Notably, these items had high loadings

472 on the *Exp-factor* and represent a total of 5 exposures among the top-loading 13. That the *Exp-*  
473 *factor* explains substantial variance in both mental and general health indicators emphasizes the  
474 need to incorporate youth-report when studying the exposome.

475 We suggest that this study be considered a roadmap when modeling environment in  
476 future investigations of developmental trajectories in longitudinal cohort studies. Notably, the  
477 current study does not investigate the exposome's associations with cognitive and imaging  
478 measures, which could be done in future works utilizing multimodal and longitudinal datasets.  
479 Additionally, exposome scores can be used to explore interactions within the exposome (ExE),  
480 which have been identified in association with baseline ABCD cognitive and imaging  
481 outcomes<sup>41</sup>. Similarly, exposome scores can be used as covariates to adjust for nuisance  
482 environmental variance in studies with smaller samples or when trying to dissect the link  
483 between a specific exposure and an outcome. Moreover, we suggest that integration of genetic  
484 data with the exposome scores can facilitate better modeling when studying GxE mechanisms in  
485 developmental cohorts, allowing researchers to reliably measure environment (with all its  
486 complexities) as dimensional construct in conjunction with polygenic risk scores as dimensional  
487 genetic burden<sup>79,80</sup>, as recently shown in an adult cohort<sup>24</sup>. Lastly, our findings in ABCD Study  
488 reveal large quantitative differences in latent environmental factors that illuminate disparities  
489 among demographic groups in America, which likely relate to disparities in later lifespan health  
490 outcomes<sup>81</sup>. We suggest that the exposome scores can be used to identify and focus on high-risk  
491 subgroups in large population cohorts that are more difficult to identify using *a priori*  
492 knowledge. Studies of such subpopulations are critical in the effort to tease apart mechanisms of  
493 resilience<sup>82</sup>, which are themselves influenced by multiple dimensions of environment (i.e.,

494 intrapersonal, family, neighborhood)<sup>83</sup>, and therefore require investigation in a wide  
495 environmental context.

496 A few methodological considerations we took are worth discussion. First, when  
497 determining environmental variables to include in analysis, we generally tried to take an  
498 inclusive approach informed by literature on environmental effects on development<sup>2,84,85</sup>. We  
499 included some variables that have substantial genetic components (e.g., parent psychopathology)  
500 and others that are confounded by psychopathology (e.g., school enjoyment). We chose not to  
501 include substance use variables, which we considered to reflect “psychopathology indicators”  
502 rather than environmental exposures in the young age range of this study. Second, we chose to  
503 use a bifactor model to fit the exposome data. This was largely in anticipation of a general  
504 exposome factor that would “absorb” any correlations among the latent factors. This model also  
505 produces orthogonal scores useful in downstream analyses to interpret specific effects. These  
506 decisions are rationalized and detailed in full in **Methods**.

507  
508 **Limitations**

509 Our findings should be viewed considering several limitations. First, we acknowledge  
510 that although we attempted to include all possible environmental factors in the two datasets, we  
511 nevertheless had to follow a reasoned decision-making process to determine what exactly to  
512 include in our analyses. For example, in ABCD we used composite scores as opposed to raw  
513 scores in some instances; and in PNC we chose to include specific geocoded Census variables  
514 based on our previous works. These decisions could have influenced results. Nevertheless, the  
515 current analysis provides, to our knowledge, the most comprehensive evaluation of environment  
516 in developmental cohorts and includes youth-report of key adversities that were not included in  
517 previous studies. Second, we used cross-sectional data to test associations of the exposome

518 factors with psychopathology, obesity, and pubertal development. Longitudinal studies are  
519 warranted to evaluate temporal relationship between exposome and health trajectories and  
520 identify causal mechanisms. Third, there are inherent limitations to collection of environmental  
521 data, such as the retrospective report of events and recall bias. Fourth, our study does not address  
522 the complexity of genetic contribution to environmental exposures (including gene-environment  
523 correlations). This line of research is critical to address specificity of exposome effects on  
524 development and merits thorough future investigation outside the scope of the current work.  
525 Fifth, while PNC was similar to the ABCD Study sample in terms of mean age and gender  
526 distribution, it was significantly different in its racial/ethnic composition and it had significantly  
527 fewer environmental exposures that we could use for replication. Relatedly, each dataset had its  
528 inherent limitations. PNC was done in one site, making it impossible to address state-level  
529 environment exposome. In contrast, a sample as complex as the ABCD Study, with its 21 sites,  
530 includes much potential for measurement invariance violations- for example, by race, by sex, by  
531 site, and other demographic groupings. It is important for future research to investigate  
532 consistency of measurement models across groups and sites, but it is beyond a scope of the  
533 current work. Finally, we did not take a “best practice” approach to the factor analyses (i.e., split  
534 the sample, estimate an EFA model in one portion, and test the EFA model in a CFA in the other  
535 portion). However, we did not intend to test a theoretical structural model, not even the one  
536 “found” by the EFA. Instead, the purpose was to derive scores from the model that most  
537 reasonably fit the entire ABCD and PNC datasets. We suggest that cross-validation of the scores  
538 will occur as they are used in downstream analyses, especially of longitudinal data that is and  
539 will be available for both cohorts.  
540

541 **Conclusion**

542           We leveraged two large, diverse datasets of US adolescents with deep phenotyping of  
543 environmental exposures to produce a roadmap for studying the exposome in youth. We propose  
544 that the exposome paradigm allows research to move beyond “looking under the lamp post” to a  
545 rounded dimensional investigation of environmental burden during development. We hope that  
546 future studies will build on the exposome framework in longitudinal cohorts to better understand  
547 developmental trajectories of youths through its integration in multi-omic research of brain,  
548 behavior, and health.



549 **Methods**

550 **Participants**

551 The ABCD sample includes 11,878 children aged 9–10 years at baseline, recruited through  
552 school systems<sup>86</sup>. For the purposes of this study, 1-year follow-up data was used (N=11,235).  
553 Participants were enrolled at 21 sites, with the catchment area encompassing over 20% of the  
554 entire US population in this age group. All participants gave assent. Parents/caregivers signed  
555 informed consent. The ABCD protocol was approved by the University of California, San Diego  
556 Institutional Review Board (IRB), and was exempted from a full review by the University of  
557 Pennsylvania IRB. See **Supplemental Table 1** for full demographic data.

558 The PNC is a collaboration between the Children’s Hospital of Philadelphia (CHOP) and  
559 the Brain Behavior Laboratory at the University of Pennsylvania. Participants were from the  
560 greater Philadelphia area were ascertained through the Children’s Hospital of Philadelphia  
561 (CHOP) pediatric health care network. The PNC included children aged 8–21 years (N = 9, 498).  
562 For participants aged 8–10, clinical evaluation including probing for suicidal ideation was done  
563 using a parent report. For participants 11 and older, clinical evaluation was based on an interview  
564 with the youth. For the current study, to keep with the developmental stage of the ABCD sample,  
565 we only included PNC participants under age 14 years old (N=4,933, see **Supplemental Table**  
566 **15** for demographic data). Participants’ written assent and parental consent were obtained.  
567 University of Pennsylvania and CHOP’s Institutional Review Boards approved all procedures.

568

569 **ABCS Study analyses**

570 *Measures*

571 We included a total of 798 variables that tap participants' environmental exposures at  
572 multiple levels of analysis including family-, household-, school-, extracurricular-,  
573 neighborhood-, and state-level, as well as prenatal exposures. We included measures based on  
574 both youth- and parent-report, as well as geocoded address. We did not include genetic data as  
575 we focused on environmental exposures in this project. Additionally, we did not include imaging  
576 or neurocognitive data. Imaging procedures and the comprehensive ABCD Study neurocognitive  
577 assessment were not conducted in the ABCD Study time point used in the current exposome  
578 analysis (i.e., the 1-year follow-up assessment). **Supplemental Table 2** provides the full range of  
579 exposure measures used in the present study.

580 For the models testing associations of exposome scores with psychopathology (*P-factor*),  
581 we used variables tapping mental health (n=93, see **Supplemental Table 27** for the full list)  
582 comprising youth self- or caregiver-reported attitudes, experiences, and problems. For models  
583 testing the exposome's association with obesity and pubertal development, we used BMI and  
584 pubertal development data (measure pds\_y\_ss\_female\_category\_2 and pds\_y\_ss\_male\_cat\_2).  
585 All measures were collected at the ABCD 1-year follow-up assessment.

586

## 587 **Statistical Analysis**

588 The analytic plan and hypotheses were preregistered on Open Science Framework in  
589 October 2020, before the full release of ABCD 1-year follow-up data. Analyses were conducted  
590 from January to October 2021, following ABCD data release 3.0, which was the first full release  
591 of the 1-year follow-up data and included youth-reported life events and discrimination. We used  
592 R<sup>87</sup> (package psych<sup>88</sup>) and Mplus 8.4<sup>89</sup> for factor analyses and SPSS statistical package version  
593 26.0 for all other statistical methods. Statistical significance was set at  $P < 0.05$ .

594

595 *Handling of missing data*

596 Models testing associations of the exposome with psychopathology, obesity, and pubertal  
597 development used listwise deletion of missing data. All other analyses use pairwise deletion.

598

599 *Dimensionality reduction of environment in ABCD analyses*

600 Due to the large number of ABCD variables of multiple formats (continuous, ordinal, and  
601 nominal) and from multiple measures (youth-report scales, parent-report scales, census-level  
602 composites, etc.) of different lengths (scales used in the ABCD Study ranged from 2 to 59 items  
603 in length), the process of arriving at an optimal ABCD exposome model was complex.

604 **Supplemental Figure 1** presents a visual schematic of the steps taken to reduce dimensionality  
605 of variables. We started with 798 variables, from which we selected certain ABCD-provided  
606 summary variables according to a combination of *a priori* knowledge (e.g. similar decisions had  
607 to be made about the American Community Survey in our previous works<sup>38</sup>) and common sense,  
608 ultimately collapsing variable count to 348. We often chose to use summary scales to represent  
609 overarching culture and environment (e.g., Mexican American Cultural Values Scale, family  
610 conflict) and indicators of health (e.g., family psychiatric history, dietary habits). We included  
611 these in the following analysis and, using multiple exploratory factor analyses (EFAs), iteratively  
612 reduced the number of variables. We elaborate below, but the first iteration is representative of  
613 later iterations. It proceeded as follows:

614 1. Estimate a mixed correlation matrix where each bivariate relationship in the matrix is  
615 appropriate to the variable types. If two variables are continuous, use a Pearson correlation; if  
616 they are both dichotomous, use a tetrachoric correlation; if they are both ordinal (or one ordinal

617 and one dichotomous), use polychoric; if one is continuous and the other dichotomous, use  
618 biserial; and if one is continuous and the other ordinal, use polyserial.

619 2. Determine the number of factors to extract based on subjective evaluation of the plot of  
620 descending eigenvalues (scree plot). That is, visually, subjectively determine where on the scree  
621 plot the decreasing function begins to form a linear trend (find the “elbow”). **Supplemental**  
622 **Figure 3** shows an example of a scree plot for determining the number of factors to extract.

623 3. Estimate an EFA model using least-squares extraction and oblimin rotation.

624 4. Examine the solution for interpretability, with particular attention to groups of variables  
625 so strongly related that they should be reduced. For example, if a factor comprised items from  
626 only one scale, with very high loadings on that factor and near-zero loadings elsewhere, that  
627 would suggest the scale could be reduced.

628 5. Use secondary factor analyses to reduce the groups of variables discovered in #4 above.  
629 For example, if all items from a checklist of negative life events loaded together in the solution  
630 in #4 above, submit that checklist to its own factor analysis. As in the main analysis, choose the  
631 number of factors based on subjective evaluation of the scree plot, calculate the appropriate  
632 correlation matrix (if a yes/no checklist, tetrachorics would be used), and use least-squares  
633 extraction with oblimin rotation.

634 6. Reduce the variables from #4 and #5 above by creating composite scores. In the present  
635 study, these composites were calculated using the following rules: a) if variables are  
636 dichotomous, take the mean to get a proportion endorsed; b) if variables are ordinal, z-transform  
637 them and take the mean; c) if variables are continuous, calculate factor scores (oblique  
638 Thurstone/regression method) from the model in #5 above.

639 7. Replace the variables discovered in #4 above with the variables created in #6 above.

640 Using this updated data set, go back to #1 and repeat.

641 In the present study, the above steps were repeated 9 times (**Supplemental Tables 3-11**) to  
642 arrive at a set of 96 variables with minimal redundancy. Next, we estimated an EFA solution  
643 using the “clean” 96-variable dataset obtained from the iterative process described above. A  
644 unique aspect of this step was that, because we expected complex structure whereby some cross-  
645 loadings would be substantial and meaningful, we used iterated target rotation (ITR)<sup>90,91</sup> rather  
646 than a simple structure rotation like oblimin or promax. Whereas simple structure rotations  
647 attempt to get p-1 elements in each row as close to zero as possible (where p = number of  
648 factors), ITR allows salient cross-loadings to be estimated freely. It starts with a simple structure  
649 rotation (here, oblimin), uses the resulting pattern matrix to determine not only which item loads  
650 where but also which cross-loadings might be non-negligible, and builds a partially-specified  
651 target matrix that incorporates cross-loading items<sup>92</sup>. Specifically, it uses a user-defined  
652 threshold (here, 0.20), sets all elements of the target matrix at 0 for items loading below that  
653 threshold, and sets all other (non-negligible) loadings to “unspecified” (indicating they should be  
654 estimated freely). The results of this target rotation are then used in the same way as the original  
655 simple structure rotation to specify a new target, and the process is repeated. When a new target  
656 matrix matches a previous target matrix in the iterative process, the ITR solution has converged.

657 With the EFA solution obtained from the above ITR process, we went on to define a quasi-  
658 confirmatory bifactor analysis from which ABCD exposome factor scores could be obtained.  
659 The bifactor model confirmatory factor analysis (CFA) was estimated in Mplus using the wlsmv  
660 estimator, accounting for clustering by family. A bifactor model uses a factor configuration  
661 whereby each variable loads not only on its specific factor (e.g., a measure of family poverty

662 might load on a “household adversity” factor), but also on a general exposome factor comprising  
663 (with estimated loadings on) all variables. Note that this analysis reduced the included items  
664 from 96 to 65 according to significance of within-factor association. A visual presentation of the  
665 exposome bifactor solution is presented in **Figure 2**. Additionally, please see **Supplemental**  
666 **Table 28** for bifactor indices<sup>93</sup>, such as explained common variance (ECV), omega-hierarchical,  
667 and factor determinacy. Some aspects of our approach are unique and require clarification.  
668 First, it is important to state why we used a CFA on the same sample as was used for the EFAs,  
669 whereas it’s typical to perform EFAs on a training sample to provide a configuration that CFA  
670 can then confirm in a separate sample. If we wished to make a claim about the “true” theoretical  
671 structure of the exposome, then a cross-validation framework would be optimal, as we have done  
672 in a previous work<sup>94</sup>. However, we conceptualize the exposome here as a bottom-up collection of  
673 phenomena that define it (the exposome) *ad hoc*. If additional variables were added to the  
674 analysis (e.g., prevalence of venomous snakes in the area or affordability of local fresh  
675 vegetables), the definition of the exposome itself would change. This is in contrast to, for  
676 example, depression, whose definition does not change when indicators are added; additional  
677 indicators simply increase the precision of measurement. In this sense, the goal of the present  
678 study was simply to calculate scores for use in downstream analysis (as shown in this study with  
679 the exposome factors’ association with psychopathology, obesity, and pubertal development),  
680 and confirmatory bifactor modeling allowed optimal estimation of those scores. Furthermore, it  
681 is important to clarify why a confirmatory model was used to calculate scores as opposed to the  
682 original, exploratory model. CFA was used here because, as of this study, there is no good  
683 bifactor rotation available. The most common “bifactor” rotation, the Schmid-Leiman, is not a  
684 true bifactor. It estimates a higher-order solution and transforms that to a bifactor configuration,

685 which necessitates proportionality constraints on the solution. Another option is the Jennrich-  
686 Bentler true bifactor rotation<sup>47</sup>, which has been shown to perform poorly in multiple studies to  
687 date<sup>46</sup>. It is therefore preferred to use a confirmatory bifactor model to obtain scores.

688 A second aspect of our approach that requires explanation is the decision to use a  
689 bifactor model at all, given the weak inter-factor correlations found in the final EFA (see  
690 **Results**). Bifactor modeling accounts for inter-factor correlations by modeling the overall factor  
691 as its own phenomenon, unlike, for example, orthogonal EFA rotations (like varimax), which  
692 force orthogonality onto solutions without accounting for the true obliqueness of the phenomena.  
693 Usually, one of the indications that a bifactor model might be useful is moderate-to-strong inter-  
694 factors correlations, which suggest the existence of an overall, general factor underlying all item  
695 responses<sup>51</sup>. Here, inter-factor correlations were weak, suggesting that there may not be a  
696 hierarchical structure to environmental exposures (neither second-order nor bifactor). However,  
697 in addition to common sense suggesting that adverse environments at the distal level beget  
698 adverse environments at the proximal level, there is increasing evidence that bifactor general  
699 factors can contain critically important information even when inter-factor correlations are  
700 weak<sup>95</sup>. This is possible because, while the subfactors of a model might correlate only weakly,  
701 individual items within each subfactor may still load strongly on the general factor. The above-  
702 cited example demonstrates not only that such a phenomenon exists, but that the general factor  
703 scores generated from the seemingly ill-advised models have substantial validity.

#### 704 *Association of exposome scores with demographic characteristics*

705 For comparisons of exposome scores within each demographic variable (males vs.  
706 females, high vs. low parent education and household income, and comparisons across race and

707 ethnicity), we used t-tests (Bonferroni corrected for seven comparisons), with Cohen's *d* to  
708 estimate effect size.

709

#### 710 *Generation of P-factor in ABCD*

711 The exposome analyses required some special modeling due to the mixture of variable  
712 formats (continuous, ordinal, etc.) and expected complex structure. By contrast, because all  
713 psychopathology variables (*n*=93) in this study were items (youth self- or caregiver-reported  
714 attitudes, experiences, and problems; see **Supplemental Table 27** for the full variable list), they  
715 could be analyzed entirely within an item-factor analysis framework<sup>96</sup> whereby all correlations  
716 are polychoric rather than being a mix of types. This analysis (using oblimin rotation) revealed  
717 that the psychopathology items clustered exactly by instrument (i.e., questionnaire/scale), with  
718 only two cross-loadings >0.30; see **Supplemental Table 29**). The “clean” solution supports our  
719 use of a simple structure rotation. All items thusly grouped by instrument form a 6-factor  
720 solution. Specifically, *Factor 1* comprises variables most related to symptoms of psychosis and  
721 associated prodrome. *Factor 2* comprises variables most related to suicidal ideation or attempt  
722 (suicidality). *Factor 3* comprises variables most related to externalizing symptoms. *Factor 4*  
723 comprises variables most related to manic symptoms. *Factor 5* comprises variables most related  
724 to self-reported (mostly internalizing) symptoms. *Factor 6* comprises variables most related to  
725 positive affect.

726 The results of the configuration above were taken as the basis of the confirmatory model  
727 used to calculate the *P-factor* score using a bifactor model CFA estimated in Mplus using the  
728 wlsmv estimator, accounting for clustering by family. **Supplemental Table 30** details results  
729 from confirmatory bifactor model analysis, displaying specific factor loadings as well as



730 loadings to a general psychopathology factor. Overall, fit of the model was acceptable  
731 (CFI=0.93; RMSEA=0.023; SRMR=0.085), and these results are presented visually in  
732 **Supplemental Figure 4**. This general *P-factor* score was used for subsequent correlational  
733 analyses with the exposome factor scores.

734

#### 735 *Associations of exposome scores with the mental health in ABCD*

736 We tested the association of exposome scores (the general *Exp-factor* and the six  
737 orthogonal subfactors) with the *P-factor* (dependent variable in the main analysis) and with total  
738 CBCL t-score (in sensitivity analysis) using a linear regression with the seven exposome factors  
739 as independent variables and age, sex, parent education, household income, race (White, Black,  
740 Asian, Other), and Hispanic ethnicity as covariates. The model was also run without the  
741 exposome scores to estimate the change of adjusted  $R^2$  upon addition of exposome scores to the  
742 model.

743

#### 744 *Association of exposome scores with obesity and pubertal development in ABCD*

745 We tested the association of exposome scores (the general *Exp-factor* and the six  
746 orthogonal subfactors) with obesity or pubertal development (two separate models) using a  
747 binary logistic regression model with obesity (binary variable, BMI percentile $\geq$ 95); or with  
748 advanced pubertal development status (binary variable of being late/post-pubertal stage [4/5 on a  
749 5 Likert scale of pubertal development] contrasted against pre-/early-/mid-pubertal status [1-3 on  
750 the Likert scale]) as the dependent variables, and the seven exposome factors as independent  
751 variables, co-varying for age, sex, parental education, household income, race (White, Black,  
752 Other), and Hispanic ethnicity. The pubertal development model also co-varied for BMI.

753

## 754 **Sensitivity analyses**

755 We conducted sensitivity analyses where we used other mental health measures as dependent  
756 variables instead of the P-factor, as in main analyses. We ran linear regression models with the  
757 total child behavior checklist [CBCL] t-score and binary logistic regression models with binary  
758 diagnosis of depression or ADHD based on the K-SADS interview. In all of these models,  
759 exposome factors were the independent variables with the same co-variates as in main analyses  
760 (age, sex, race, ethnicity, household income and parent education).

761 We also conducted sensitivity analyses for the models of general health measures, using binary  
762 logistic regression with continuous BMI percentile scores and continuous pubertal scale as  
763 dependent variable, instead of binary measures (obesity and advanced pubertal status) as in main  
764 analyses. In both models, exposome factors were the independent variables and co-variates were  
765 identical to main analyses (age, sex, race, ethnicity, household income, parent education, and  
766 BMI as an additional covariate in the model of pubertal development).

767 Lastly, to account for clustering within site and family, we ran mixed-effects regression models  
768 for both mental health (with P-factor and CBCL scores) and general health measures (with BMI  
769 and pubertal scales) with random intercepts for site and family using the lmer() function in the  
770 lmerTest package.

771

## 772 **PNC analyses**

### 773 *Measures*

774 Lifetime history of psychopathology symptoms were evaluated by trained and supervised  
775 Bachelor's and Master's level assessors who underwent rigorous standardized training and

776 certification using a structured screening interview <sup>28</sup>, based on the Kiddie Schedule for Affective  
777 Disorders and Schizophrenia (K-SADS) <sup>97</sup>. Generation of P-factor scores was done as described  
778 above for the ABCD Study, using item-wise (i.e., symptom-level) psychopathology responses  
779 (total 110 items) from the clinical interview across all assessed psychopathology domains<sup>63,64</sup>.

780

### 781 *Generation of Exposome scores in PNC*

782 To generate exposome scores, we assembled all environmental variables that were  
783 collected as part of the PNC assessment. As in the ABCD Study, we used a permissive definition  
784 of environment and considered family history of psychiatric disorders as an environmental  
785 exposure. The exposures included (i) family history of psychiatric disorders based on the  
786 abbreviated version of the Family Interview for Genetic Studies (Maxwell, 1996) and an  
787 indicator whether the parents are separated or not; (ii) traumatic experiences assessed with a  
788 screener for eight traumatic experiences (yes/no items) that fulfill criterion A in post-traumatic-  
789 stress-disorder diagnosis<sup>36</sup>; (iii) census neighborhood (block-group-level) measures derived from  
790 participants' geocoded address <sup>38</sup>; (iv) two items tapping early life exposure: birth complication  
791 and history of lead exposure (both binary yes/no items).

792 Generation of the PNC exposome score was done using a confirmatory bifactor model,  
793 generating a general (adversity) PNC exposome score and four subfactors. Fit of the model was  
794 judged based on the same indices as described above for the ABCD portion (CFI, RMSEA, and  
795 SRMR). Additionally, please see **Supplemental Table 28** for bifactor indices<sup>93</sup>, such as  
796 explained common variance (ECV), omega-hierarchical, and factor determinacy.

### 797 *Association of exposome scores with psychopathology, obesity and puberty in PNC*

798 After the generation of the exposome scores, we followed the same approach as in the  
799 ABCD Study and tested the association of exposome scores with the P-factor (linear regression)

800 with obesity (BMI percentile>95%) or advanced pubertal development (binary logistic  
801 regression). In the models testing associations with pubertal development, we limited the PNC  
802 sample to ages 10-12 (n=1,496), to minimize the large age effect sizes that were present when  
803 using age range 8-13 on pubertal development in the full PNC generalization sample. Models co-  
804 varied for age, sex, race (White, Black, Other), Hispanic ethnicity and parental education.

805

806 *“Harmonized” models across ABCD and PNC*

807 In attempt to maximize similarity across the two datasets, we ran similar regression  
808 models (linear for continuous measures and binary logistic for binary measures) with exposome  
809 factors as independent variables co-varying for measures that were available in both ABCD and  
810 PNC: age, sex, Race, Hispanic ethnicity, and parental education (**Table 4**).

811 *Acknowledgements*

812 Data used in the preparation of this article were obtained from the Adolescent Brain Cognitive  
813 Development<sup>SM</sup> (ABCD) Study (<https://abcdstudy.org>), held in the NIMH Data Archive (NDA).  
814 This is a multisite, longitudinal study designed to recruit more than 10,000 children age 9-10 and  
815 follow them over 10 years into early adulthood. The ABCD Study® is supported by the National  
816 Institutes of Health and additional federal partners under award numbers U01DA041048,  
817 U01DA050989, U01DA051016, U01DA041022, U01DA051018, U01DA051037,  
818 U01DA050987, U01DA041174, U01DA041106, U01DA041117, U01DA041028,  
819 U01DA041134, U01DA050988, U01DA051039, U01DA041156, U01DA041025,  
820 U01DA041120, U01DA051038, U01DA041148, U01DA041093, U01DA041089,  
821 U24DA041123, U24DA041147. A full list of supporters is available  
822 at <https://abcdstudy.org/federal-partners.html>. A listing of participating sites and a complete  
823 listing of the study investigators can be found at [https://abcdstudy.org/consortium\\_members/](https://abcdstudy.org/consortium_members/).  
824 The Philadelphia Neurodevelopmental Cohort was supported by grants RC2MH089983,  
825 RC2MH089924.

826

827 *Author Contribution*

828 TMM and RB conceptualized and designed the study, conducted the analyses, interpreted the  
829 data and drafted the first version of the manuscript. EV, STA, GED, IS, JW and AN substantially  
830 contributed to study design, organization and analysis of data and visualization of findings, and  
831 have all substantially contributed to revision of the first draft of the manuscript. RCG, REG,  
832 VW, and SG substantially contributed to study design and conceptualization, interpretation of  
833 findings, and have provided substantial input to revision the manuscript from its first draft till its

834 final version. All authors have approved the submitted version and have agreed to be accountable  
835 to the submitted study.

836

837 *Competing interest statement*

838 Dr Barzilay serves on the scientific board and reports stock ownership in ‘Taliaz Health’, with no  
839 conflict of interest relevant to this work. All other authors have no conflicts of interest do  
840 declare.

841

842 *Funding*

843 This study was supported by the National Institute of Mental Health grants K23MH120437 (RB),  
844 RO1MH117014 (TMM, RCG) and the Lifespan Brain Institute of Children’s Hospital of  
845 Philadelphia and Penn Medicine, University of Pennsylvania. VW was funded by the Bowring  
846 Research Fellowship, the Wellcome Trust, and the Templeton World Charity Foundation.

847

848 *Role of the funding source*

849 The funding organization had no role in the design and conduct of the study; collection,  
850 management, analysis, and interpretation of the data; preparation, review, or approval of the  
851 manuscript; and decision to submit the manuscript for publication.

852

853 *Disclaimer*

854 ABCD consortium investigators designed and implemented the study and/or provided data but  
855 did not participate in analysis or writing of this report. This manuscript reflects the views of the

856 authors and may not reflect the opinions or views of the National Institutes of Health or ABCD  
857 consortium investigators.

858

859 *Additional Information*

860 Data used in the preparation of this article were obtained from the Adolescent Brain Cognitive  
861 Development Study (<https://abcdstudy.org>), held in the National Institute of Mental Health Data  
862 Archive. A full list of supporters is available at <https://abcdstudy.org/federal-partners.html>. A  
863 listing of participating sites and a complete listing of the study investigators can be found at  
864 [https://abcdstudy.org/consortium\\_members/](https://abcdstudy.org/consortium_members/). Data preprocessing and analysis are detailed at  
865 [https://github.com/barzilab1/abcd\\_exposome](https://github.com/barzilab1/abcd_exposome).

866

867 References

- 868 1. Jensen AR. The puzzle of nongenetic variance. In: *Intelligence, Heredity, and Environment*.  
869 Cambridge University Press; 1997:42-88.
- 870 2. Hughes K, Bellis MA, Hardcastle KA, et al. The effect of multiple adverse childhood experiences  
871 on health: a systematic review and meta-analysis. *The Lancet Public Health*. 2017;2(8):e356-e366.  
872 doi:10.1016/S2468-2667(17)30118-4
- 873 3. Burt SA. Rethinking environmental contributions to child and adolescent psychopathology: a  
874 meta-analysis of shared environmental influences. *Psychological bulletin*. 2009;135(4):608-637.  
875 doi:10.1037/A0015702
- 876 4. Zeanah CH, Gunnar MR, McCall RB, Kreppner JM, Fox NA. Sensitive Periods. *Monographs of the*  
877 *Society for Research in Child Development*. 2011;76(4):147. doi:10.1111/J.1540-  
878 5834.2011.00631.X
- 879 5. Chaix B, Leal C, Evans D. Neighborhood-level confounding in epidemiologic studies: Unavoidable  
880 challenges, uncertain solutions. *Epidemiology*. 2010;21(1):124-127.  
881 doi:10.1097/EDE.0b013e3181c04e70
- 882 6. Rappaport SM, Smith MT. Environment and disease risks. *Science*. 2010;330(6003):460-461.  
883 doi:10.1126/science.1192603
- 884 7. Guloksuz S, Rutten BPF, Pries LK, et al. The Complexities of Evaluating the Exposome in  
885 Psychiatry: A Data-Driven Illustration of Challenges and Some Propositions for Amendments.  
886 *Schizophrenia Bulletin*. 2018;44(6):1175-1179. doi:10.1093/SCHBUL/SBY118
- 887 8. Diathesis-Stress Interaction - an overview | ScienceDirect Topics. Accessed June 12, 2021.  
888 <https://www.sciencedirect.com/topics/psychology/diathesis-stress-interaction>
- 889 9. Crofton EJ, Zhang Y, Green TA. Inoculation stress hypothesis of environmental enrichment.  
890 *Neuroscience and Biobehavioral Reviews*. 2015;49:19-31. doi:10.1016/j.neubiorev.2014.11.017
- 891 10. Wadhwa PD, Buss C, Entringer S, Swanson JM. Developmental Origins of Health and Disease:  
892 Brief History of the Approach and Current Focus on Epigenetic Mechanisms. *Seminars in*  
893 *reproductive medicine*. 2009;27(5):358. doi:10.1055/S-0029-1237424
- 894 11. Warrier V, Kwong ASF, Luo M, et al. Gene–environment correlations and causal effects of  
895 childhood maltreatment on physical and mental health: a genetically informed approach. *The*  
896 *Lancet Psychiatry*. 2021;8(5):373-386. doi:10.1016/S2215-0366(20)30569-1
- 897 12. Kong A, Thorleifsson G, Frigge ML, et al. The nature of nurture: Effects of parental genotypes.  
898 *Science*. 2018;359(6374):424-428. doi:10.1126/science.aan6877
- 899 13. Belsky DW, Domingue BW, Wedow R, et al. Genetic analysis of social-class mobility in five  
900 longitudinal studies. *Proceedings of the National Academy of Sciences of the United States of*  
901 *America*. 2018;115(46):E10998. doi:10.1073/pnas.1817958115



- 902 14. Colodro-Conde L, Couvy-Duchesne B, Whitfield JB, et al. Association between population density  
903 and genetic risk for schizophrenia. *JAMA Psychiatry*. 2018;75(9):901-910.  
904 doi:10.1001/jamapsychiatry.2018.1581
- 905 15. Abdellaoui A, Hugh-Jones D, Yengo L, et al. Genetic correlates of social stratification in Great  
906 Britain. *Nature Human Behaviour*. 2019;3(12):1332-1342. doi:10.1038/s41562-019-0757-5
- 907 16. Stingone JA, Buck Louis GM, Nakayama SF, et al. Toward Greater Implementation of the  
908 Exposome Research Paradigm within Environmental Epidemiology. In: *Annual Review of Public*  
909 *Health*. Vol 38. Annual Reviews Inc.; 2017:315-327. doi:10.1146/annurev-publhealth-082516-  
910 012750
- 911 17. Wild CP. Complementing the genome with an “exposome”: The outstanding challenge of  
912 environmental exposure measurement in molecular epidemiology. *Cancer Epidemiology*  
913 *Biomarkers and Prevention*. 2005;14(8):1847-1850. doi:10.1158/1055-9965.EPI-05-0456
- 914 18. Rappaport SM. Implications of the exposome for exposure science. *Journal of Exposure Science &*  
915 *Environmental Epidemiology* 2011 21:1. 2010;21(1):5-9. doi:10.1038/jes.2010.50
- 916 19. Renz H, Holt PG, Inouye M, Logan AC, Prescott SL, Sly PD. An exposome perspective: Early-life  
917 events and immune development in a changing world. *Journal of Allergy and Clinical*  
918 *Immunology*. 2017;140(1):24-40. doi:10.1016/J.JACI.2017.05.015
- 919 20. Vermeulen R, Schymanski EL, Barabási AL, Miller GW. The exposome and health: Where  
920 chemistry meets biology. *Science*. 2020;367(6476):392-396. doi:10.1126/science.aay3164
- 921 21. DeBord DG, Carreón T, Lentz TJ, Middendorf PJ, Hoover MD, Schulte PA. Use of the “exposome”  
922 in the Practice of Epidemiology: A Primer on -Omic Technologies. *American Journal of*  
923 *Epidemiology*. 2016;184(4):302-314. doi:10.1093/aje/kwv325
- 924 22. Guloksuz S, Van Os J, Rutten BPF. The Exposome Paradigm and the Complexities of  
925 Environmental Research in Psychiatry. *JAMA Psychiatry*. 2018;75(10):985-986.  
926 doi:10.1001/jamapsychiatry.2018.1211
- 927 23. Pries LK, Erzin G, Rutten BPF, van Os J, Guloksuz S. Estimating Aggregate Environmental Risk  
928 Score in Psychiatry: The Exposome Score for Schizophrenia. *Frontiers in psychiatry*. 2021;12.  
929 doi:10.3389/FPSYT.2021.671334
- 930 24. Pries LK, van Os J, ten Have M, et al. Association of recent stressful life events with mental and  
931 physical health in the context of genomic and exposomic liability for schizophrenia. *JAMA*  
932 *Psychiatry*. 2020;77(12):1296-1304. doi:10.1001/jamapsychiatry.2020.2304
- 933 25. Barzilay R, Moore TM, Calkins ME, et al. Deconstructing the role of the exposome in youth  
934 suicidal ideation: Trauma, neighborhood environment, developmental and gender effects.  
935 *Neurobiology of Stress*. 2021;14:100314. doi:10.1016/j.ynstr.2021.100314
- 936 26. Mattison DR. Environmental exposures and development. *Current Opinion in Pediatrics*.  
937 2010;22(2):208-218. doi:10.1097/MOP.0B013E32833779BF

- 938 27. Barch DM, Albaugh MD, Avenevoli S, et al. Demographic, physical and mental health assessments  
939 in the adolescent brain and cognitive development study: Rationale and description.  
940 *Developmental Cognitive Neuroscience*. 2018;32:55-66. doi:10.1016/j.dcn.2017.10.010
- 941 28. Calkins ME, Merikangas KR, Moore TM, et al. The Philadelphia Neurodevelopmental Cohort:  
942 constructing a deep phenotyping collaborative. *Journal of Child Psychology and Psychiatry*.  
943 2015;56(12):1356-1369. doi:10.1111/jcpp.12416
- 944 29. Hoffman EA, Clark DB, Orendain N, Hudziak J, Squeglia LM, Dowling GJ. Stress exposures,  
945 neurodevelopment and health measures in the ABCD study. *Neurobiology of Stress*. 2019;10.  
946 doi:10.1016/j.ynstr.2019.100157
- 947 30. Jeong HJ, Durham EL, Moore TM, et al. The association between latent trauma and brain  
948 structure in children. *Translational Psychiatry* 2021 11:1. 2021;11(1):1-9. doi:10.1038/s41398-  
949 021-01357-z
- 950 31. Taylor RL, Cooper SR, Jackson JJ, Barch DM. Assessment of Neighborhood Poverty, Cognitive  
951 Function, and Prefrontal and Hippocampal Volumes in Children. *JAMA Network Open*.  
952 2020;3(11):e2023774-e2023774. doi:10.1001/JAMANETWORKOPEN.2020.23774
- 953 32. Cserbik D, Chen JC, McConnell R, et al. Fine particulate matter exposure during childhood relates  
954 to hemispheric-specific differences in brain structure. *Environment International*.  
955 2020;143:105933. doi:10.1016/J.ENVINT.2020.105933
- 956 33. Paul SE, Hatoum AS, Fine JD, et al. Associations Between Prenatal Cannabis Exposure and  
957 Childhood Outcomes: Results From the ABCD Study. *JAMA Psychiatry*. 2021;78(1):64-76.  
958 doi:10.1001/JAMAPSYCHIATRY.2020.2902
- 959 34. Nagata JM, Iyer P, Chu J, et al. Contemporary screen time usage among children 9-10-years-old is  
960 associated with higher body mass index percentile at 1-year follow-up: A prospective cohort  
961 study. *Pediatric obesity*. 2021;(June):13-17. doi:10.1111/IJPO.12827
- 962 35. Gong W, Rolls ET, Du J, Feng J, Cheng W. Brain structure is linked to the association between  
963 family environment and behavioral problems in children in the ABCD study. *Nature*  
964 *Communications* 2021 12:1. 2021;12(1):1-10. doi:10.1038/s41467-021-23994-0
- 965 36. Barzilay R, Calkins ME, Moore TM, et al. Association between traumatic stress load,  
966 psychopathology, and cognition in the Philadelphia Neurodevelopmental Cohort. *Psychological*  
967 *Medicine*. 2019;49(2):325-334. doi:10.1017/S0033291718000880
- 968 37. Gur RE, Moore TM, Rosen AFG, et al. Burden of Environmental Adversity Associated with  
969 Psychopathology, Maturation, and Brain Behavior Parameters in Youths. *JAMA Psychiatry*.  
970 2019;76(9):966-975. doi:10.1001/jamapsychiatry.2019.0943
- 971 38. Moore TM, Martin IK, Gur OM, et al. Characterizing social environment's association with  
972 neurocognition using census and crime data linked to the Philadelphia Neurodevelopmental  
973 Cohort. *Psychological Medicine*. 2016;46(03):599-610. doi:10.1017/S0033291715002111

- 974 39. Umer A, Kelley GA, Cottrell LE, Giacobbi P, Innes KE, Lilly CL. Childhood obesity and adult  
975 cardiovascular disease risk factors: a systematic review with meta-analysis. *BMC public health*.  
976 2017;17(1). doi:10.1186/S12889-017-4691-Z
- 977 40. Hoyt LT, Niu L, Pachucki MC, Chaku N. Timing of puberty in boys and girls: Implications for  
978 population health. *SSM - population health*. 2020;10. doi:10.1016/J.SSMPH.2020.100549
- 979 41. Marshall AT, Betts S, Kan EC, McConnell R, Lanphear BP, Sowell ER. Association of lead-exposure  
980 risk and family income with childhood brain outcomes. *Nature Medicine* 2020 26:1.  
981 2020;26(1):91-97. doi:10.1038/s41591-019-0713-y
- 982 42. Tomasi D, Volkow ND. Associations of family income with cognition and brain structure in USA  
983 children: prevention implications. *Molecular Psychiatry* 2021. Published online May 14, 2021:1-  
984 11. doi:10.1038/s41380-021-01130-0
- 985 43. Akhlaghipour G, Assari S. Parental Education, Household Income, Race, and Children's Working  
986 Memory: Complexity of the Effects. *Brain sciences*. 2020;10(12):1-20.  
987 doi:10.3390/BRAINSCI10120950
- 988 44. Noble KG, Houston SM, Brito NH, et al. Family income, parental education and brain structure in  
989 children and adolescents. *Nature neuroscience*. 2015;18(5):773-778. doi:10.1038/NN.3983
- 990 45. Reise SP. The Rediscovery of Bifactor Measurement Models.  
991 <https://doi.org/10.1080/002731712012715555>. 2012;47(5):667-696.  
992 doi:10.1080/00273171.2012.715555
- 993 46. Mansolf M, Reise SP. Exploratory Bifactor Analysis: The Schmid-Leiman Orthogonalization and  
994 Jennrich-Bentler Analytic Rotations. *Multivariate Behavioral Research*. 2016;51(5):698-717.  
995 doi:10.1080/00273171.2016.1215898
- 996 47. Jennrich R, Bentler P. Exploratory bi-factor analysis. *Psychometrika*. 2011;76(4):537-549.
- 997 48. Reise S, Moore T, Maydeu-Olivares A. Target rotations and assessing the impact of model  
998 violations on the parameters of unidimensional item response theory models. *Educational and*  
999 *Psychological Measurement*. 2011;71(4):684-711. doi:10.1177/0013164410378690
- 1000 49. Lorenzo-Seva U, Ferrando PJ. A General Approach for Fitting Pure Exploratory Bifactor Models.  
1001 *Multivariate Behavioral Research*. 2019;54(1):15-30. doi:10.1080/00273171.2018.1484339
- 1002 50. Moore TM, Lahey BB. Issues in Estimating Interpretable Lower Order Factors in Second-Order  
1003 Hierarchical Models: Commentary on Clark et al. (2021). *Clinical Psychological Science*. Published  
1004 online 2021. doi:10.1177/21677026211035114
- 1005 51. Reise SP, Moore TM, Haviland MG. Bifactor Models and Rotations: Exploring the Extent to which  
1006 Multidimensional Data Yield Univocal Scale Scores. *Journal of personality assessment*.  
1007 2010;92(6):544. doi:10.1080/00223891.2010.496477
- 1008 52. Bentler PM, Bonett DG. Significance tests and goodness of fit in the analysis of covariance  
1009 structures. *Psychological Bulletin*. 1980;88(3):588-606. doi:10.1037/0033-2909.88.3.588

- 1010 53. Hu LT, Bentler PM. Cutoff criteria for fit indexes in covariance structure analysis: Conventional  
1011 criteria versus new alternatives. *Structural Equation Modeling*. 1999;6(1):1-55.  
1012 doi:10.1080/10705519909540118
- 1013 54. Heene M, Hilbert S, Draxler C, Ziegler M, Bühner M. Masking Misfit in Confirmatory Factor  
1014 Analysis by Increasing Unique Variances: A Cautionary Note on the Usefulness of Cutoff Values of  
1015 Fit Indices. *Psychological Methods*. 2011;16(3):319-336. doi:10.1037/A0024917
- 1016 55. Lai K, Green SB. The Problem with Having Two Watches: Assessment of Fit When RMSEA and CFI  
1017 Disagree. <http://dx.doi.org/10.1080/0027317120151134306>. 2016;51(2-3):220-239.  
1018 doi:10.1080/00273171.2015.1134306
- 1019 56. Sörbom D. Model modification. *Psychometrika*. 1989;54(3):371-384. doi:10.1007/BF02294623
- 1020 57. Caspi A, Houts RM, Belsky DW, et al. The p factor: One general psychopathology factor in the  
1021 structure of psychiatric disorders? *Clinical Psychological Science*. 2014;2(2):119-137.  
1022 doi:10.1177/2167702613497473
- 1023 58. Lahey BB, Applegate B, Hakes JK, Zald DH, Hariri AR, Rathouz PJ. Is There a general factor of  
1024 prevalent psychopathology during adulthood? *Journal of Abnormal Psychology*. 2012;121(4):971-  
1025 977. doi:10.1037/a0028355
- 1026 59. Allegrini AG, Cheesman R, Rimfeld K, et al. The p factor: genetic analyses support a general  
1027 dimension of psychopathology in childhood and adolescence. *Journal of Child Psychology and*  
1028 *Psychiatry and Allied Disciplines*. 2020;61(1):30-39. doi:10.1111/jcpp.13113
- 1029 60. Wulaningsih W, Van Hemelrijck M, Tsilidis KK, Tzoulaki I, Patel C, Rohrmann S. Investigating  
1030 nutrition and lifestyle factors as determinants of abdominal obesity: an environment-wide study.  
1031 *International Journal of Obesity*. 2017;41(2):340-347. doi:10.1038/ijo.2016.203
- 1032 61. Wehkalampi K, Silventoinen K, Kaprio J, et al. Genetic and Environmental Influences on Pubertal  
1033 Timing Assessed by Height Growth. *American journal of human biology : the official journal of the*  
1034 *Human Biology Council*. 2008;20(4):417. doi:10.1002/AJHB.20748
- 1035 62. Ogden CL, Flegal KM. Changes in terminology for childhood overweight and obesity. *National*  
1036 *Health Statistics Reports*. 2010;(25):1-5.
- 1037 63. Shanmugan S, Wolf DH, Calkins ME, et al. Common and dissociable mechanisms of executive  
1038 system dysfunction across psychiatric disorders in youth. *American Journal of Psychiatry*.  
1039 2016;173(5):517-526. doi:10.1176/appi.ajp.2015.15060725
- 1040 64. Moore TM, Calkins ME, Satterthwaite TD, et al. Development of a computerized adaptive  
1041 screening tool for overall psychopathology ("p"). *Journal of Psychiatric Research*.  
1042 2019;116(September 2018):26-33. doi:10.1016/j.jpsychires.2019.05.028
- 1043 65. Haltigan JD, Aitken M, Skilling T, et al. "P" and "DP:" Examining Symptom-Level Bifactor Models  
1044 of Psychopathology and Dysregulation in Clinically Referred Children and Adolescents. *Journal of*  
1045 *the American Academy of Child and Adolescent Psychiatry*. 2018;57(6):384-396.  
1046 doi:10.1016/j.jaac.2018.03.010

- 1047 66. Constantinou MP, Goodyer IM, Eisler I, et al. Changes in General and Specific Psychopathology  
1048 Factors Over a Psychosocial Intervention. *Journal of the American Academy of Child and*  
1049 *Adolescent Psychiatry*. 2019;58(8):776-786. doi:10.1016/j.jaac.2018.11.011
- 1050 67. Caspi A, Houts RM, Ambler A, et al. Longitudinal Assessment of Mental Health Disorders and  
1051 Comorbidities Across 4 Decades Among Participants in the Dunedin Birth Cohort Study. *JAMA*  
1052 *network open*. 2020;3(4):e203221. doi:10.1001/jamanetworkopen.2020.3221
- 1053 68. Cervin M, Norris LA, Ginsburg G, et al. The p Factor Consistently Predicts Long-Term Psychiatric  
1054 and Functional Outcomes in Anxiety-Disordered Youth. *Journal of the American Academy of Child*  
1055 *and Adolescent Psychiatry*. 2021;60(7):902-912.e5. doi:10.1016/j.jaac.2020.08.440
- 1056 69. Hackman DA, Farah MJ. Socioeconomic status and the developing brain. *Trends in Cognitive*  
1057 *Sciences*. 2009;13(2):65-73. doi:10.1016/J.TICS.2008.11.003
- 1058 70. Kivimäki M, Batty GD, Pentti J, et al. Association between socioeconomic status and the  
1059 development of mental and physical health conditions in adulthood: a multi-cohort study. *The*  
1060 *Lancet Public health*. 2020;5(3):e140-e149. doi:10.1016/S2468-2667(19)30248-8
- 1061 71. Lopez DA, Foxe JJ, Mao Y, Thompson WK, Martin HJ, Freedman EG. Breastfeeding Duration Is  
1062 Associated With Domain-Specific Improvements in Cognitive Performance in 9–10-Year-Old  
1063 Children. *Frontiers in Public Health*. 2021;9:434. doi:10.3389/FPUBH.2021.657422
- 1064 72. Roffman JL, Sipahi ED, Dowling KF, et al. Association of adverse prenatal exposure burden with  
1065 child psychopathology in the Adolescent Brain Cognitive Development (ABCD) Study. *PLOS ONE*.  
1066 2021;16(4):e0250235. doi:10.1371/JOURNAL.PONE.0250235
- 1067 73. Sumner JA, Colich NL, Uddin M, Armstrong D, Mclaughlin KA. Early Experiences of Threat, but not  
1068 Deprivation, Are Associated With Accelerated Biological Aging in Children and Adolescents. *Biol*  
1069 *Psychiatry*. 2019;85(3):268-278. doi:10.1016/j.biopsych.2018.09.008.Early
- 1070 74. Tooley UA, Bassett DS, Mackey AP. Environmental influences on the pace of brain development.  
1071 *Nature Reviews Neuroscience* 2021 22:6. 2021;22(6):372-384. doi:10.1038/s41583-021-00457-5
- 1072 75. Modabbernia A, Janiri D, Doucet G, Reichenberg A, Frangou S. Multivariate Patterns of Brain-  
1073 Behavior-Environment Associations in the Adolescent Brain and Cognitive Development Study.  
1074 *Biological psychiatry*. 2021;89(5):510-520. doi:10.1016/J.BIOPSYCH.2020.08.014
- 1075 76. Hong SJ, Sisk LM, Caballero C, et al. Decomposing complex links between the childhood  
1076 environment and brain structure in school-aged youth. *Developmental cognitive neuroscience*.  
1077 2021;48. doi:10.1016/J.DCN.2021.100919
- 1078 77. Karcher NR, Schiffman J, Barch DM. Environmental Risk Factors and Psychotic-like Experiences in  
1079 Children Aged 9–10. *Journal of the American Academy of Child & Adolescent Psychiatry*.  
1080 2021;60(4):490-500. doi:10.1016/J.JAAC.2020.07.003
- 1081 78. Hackman DA, Cserbik D, Chen JC, et al. Association of Local Variation in Neighborhood  
1082 Disadvantage in Metropolitan Areas With Youth Neurocognition and Brain Structure. *JAMA*  
1083 *Pediatrics*. Published online 2021:e210426-e210426. doi:10.1001/JAMAPEDIATRICS.2021.0426

- 1084 79. Wild CP. The exposome: from concept to utility. *International Journal of Epidemiology*.  
1085 2012;41(1):24-32. doi:10.1093/IJE/DYR236
- 1086 80. Barouki R, Audouze K, Coumoul X, Demenais F, Gauguier D. Integration of the human exposome  
1087 with the human genome to advance medicine. *Biochimie*. 2018;152:155-158.  
1088 doi:10.1016/J.BIOCHI.2018.06.023
- 1089 81. Lau M, Lin H, Flores G. Racial/Ethnic Disparities in Health and Health Care among U.S.  
1090 Adolescents. *Health Services Research*. 2012;47(5):2031-2059. doi:10.1111/J.1475-  
1091 6773.2012.01394.X
- 1092 82. Kalisch R, Baker DG, Basten U, et al. The resilience framework as a strategy to combat stress-  
1093 related disorders. *Nature human behaviour*. 2017;1(11):784-790. doi:10.1038/S41562-017-0200-  
1094 8
- 1095 83. Ungar M, Theron L. Review Resilience and mental health: how multisystemic processes  
1096 contribute to positive outcomes. Published online 2020:441. doi:10.1016/S2215-0366(19)30434-  
1097 1
- 1098 84. Danese A, McEwen B. Adverse childhood experiences, allostasis, allostatic load and age-related  
1099 disease. *Physiol Behav*. 2012;106:29-39.
- 1100 85. McLaughlin K, Weissman D, Bitrán D. Childhood Adversity and Neural Development: A Systematic  
1101 Review. *Annual review of developmental psychology*. 2019;1(1):277-312. doi:10.1146/ANNUREV-  
1102 DEVPSYCH-121318-084950
- 1103 86. Garavan H, Bartsch H, Conway K, et al. Recruiting the ABCD sample: Design considerations and  
1104 procedures. *Developmental Cognitive Neuroscience*. 2018;32:16. doi:10.1016/J.DCN.2018.04.004
- 1105 87. R Core Team. *R: A Language and Environment for Statistical Computing.*; 2021.
- 1106 88. Revelle W. *Psych: Procedures for Personality and Psychological Research.*; 2020.
- 1107 89. Muthén, L. K., & Muthén BO. *Mplus: Statistical Analysis with Latent Variables: User's Guide*  
1108 (Version 8). Published online 2020.
- 1109 90. Moore TM. *Iteration of Target Matrices in Exploratory Factor Analysis (Doctoral Dissertation,*  
1110 *UCLA).*; 2013.
- 1111 91. Moore T, Reise S, Depaoli S, Haviland M. Iteration of Partially Specified Target Matrices:  
1112 Applications in Exploratory and Bayesian Confirmatory Factor Analysis. *Multivariate behavioral*  
1113 *research*. 2015;50(2):149-161. doi:10.1080/00273171.2014.973990
- 1114 92. Browne MW. OBLIQUE ROTATION TO A PARTIALLY SPECIFIED TARGET. *British Journal of*  
1115 *Mathematical and Statistical Psychology*. 1972;25(2):207-212. doi:10.1111/J.2044-  
1116 8317.1972.TB00492.X
- 1117 93. Rodriguez A, Reise SP, Haviland MG. Evaluating bifactor models: Calculating and interpreting  
1118 statistical indices. *Psychological Methods*. 2016;21(2):137-150. doi:10.1037/met0000045

- 1119 94. Moore T, Kaczurkin A, Durham E, et al. Criterion validity and relationships between alternative  
1120 hierarchical dimensional models of general and specific psychopathology. *Journal of abnormal*  
1121 *psychology*. 2020;129(7):677-688. doi:10.1037/ABN0000601
- 1122 95. Moore T. THREE FACTORS OF “PLANTNESS” — TRAIT SUMMARY SCORES GENERATED FROM A  
1123 BIFACTOR MODEL WITH COMPLEX STRUCTURE. *Phytoneuron*. 2020;66:1-25.
- 1124 96. Wirth RJ, Edwards MC. Item factor analysis: current approaches and future directions.  
1125 *Psychological methods*. 2007;12(1):58-79. doi:10.1037/1082-989X.12.1.58
- 1126 97. Kaufman J, Birmaher B, Brent D, et al. Schedule for affective disorders and schizophrenia for  
1127 school-age children-present and lifetime version (K-SADS-PL): Initial reliability and validity data.  
1128 *Journal of the American Academy of Child & Adolescent Psychiatry*. 1997;36(7):980-988.  
1129 doi:10.1097/00004583-199707000-00021
- 1130
- 1131

1132 **Tables and Figures**

1133 **Figure 1.** Visual presentation of study design.

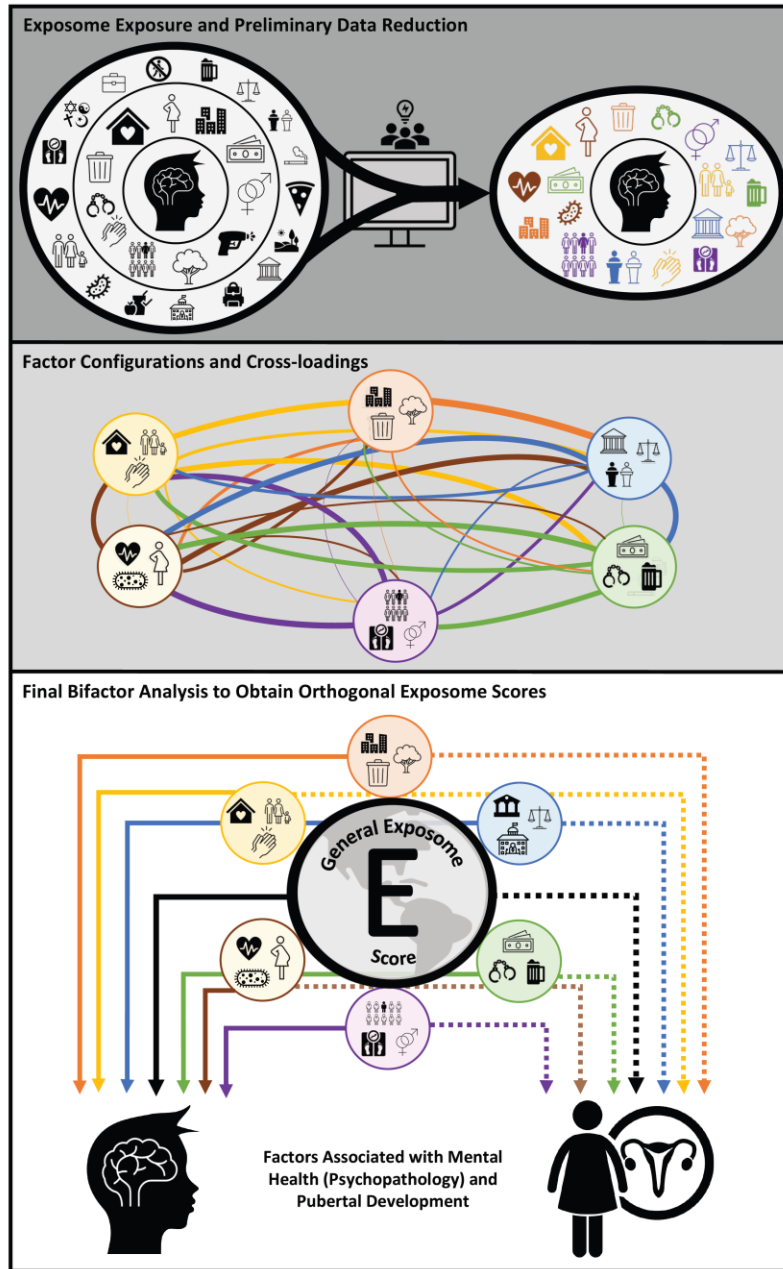

1134

1135

First, 798 environmental variables from the ABCD Study were chosen for representing the multiple dimensions of the exposome. These variables were reduced to 348 variables based on choices to use ABCD Study's summary measures, and then further reduced using an iterative process of exploratory factor analyses that identified correlated factors allowing reduction to 96 variables from multiple dimensions of environment including family, household, school, extracurricular, neighborhood and state-level and prenatal and history of antenatal exposures. (top panel). Thereafter, these 96 combined items underwent an exploratory factor analysis that culminated in a final model, which finalized factor configurations and cross-loadings (middle panel), revealing 6 factors relating to the exposome (household adversity factor, neighborhood environment factor, day-to-day experiences factor, state conservatism-ruralness factor, family values factor, and pregnancy/birth complications factor). Subsequently, these factors were subjected to confirmatory bifactor analysis, which allowed the generation of a general exposome factor informed by all items, in addition to six orthogonal exposome subfactors (bottom panel). Finally, we investigated how these exposome factors are associated with mental health, body mass index, and pubertal (pre-)development.



1136 **Table 1.** Exploratory factor analysis of the optimized collection of exposome items in the ABCD  
 1137 Study using iterated target rotation

| Item                                                                                          | House-<br>hold | Neighbor-<br>hood | Day-<br>to-<br>day | State | Family-<br>values | Pregnancy/<br>Birth<br>complications |
|-----------------------------------------------------------------------------------------------|----------------|-------------------|--------------------|-------|-------------------|--------------------------------------|
| Prenatal exposure to tobacco or marijuana                                                     | <b>0.72</b>    |                   |                    |       |                   |                                      |
| Parental lifestyle issues (e.g., trouble with holding job, police, alcohol use)               | <b>0.69</b>    |                   |                    |       |                   |                                      |
| Physical conflict among adults at the home                                                    | <b>0.64</b>    |                   |                    |       |                   |                                      |
| Prenatal exposure to hard drugs (e.g., cocaine, heroin)                                       | <b>0.56</b>    |                   |                    |       |                   |                                      |
| Severe maternal mental health issues (e.g., breakdowns, delusions, hospitalizations)          | <b>0.46</b>    |                   |                    |       |                   |                                      |
| Planned pregnancy                                                                             | <b>-0.45</b>   | -0.23             |                    |       |                   |                                      |
| Severe family poverty (e.g., inability to afford necessities)                                 | <b>0.45</b>    | 0.31              |                    |       |                   |                                      |
| Parent-reported sexual abuse                                                                  | <b>0.44</b>    |                   |                    |       |                   |                                      |
| Caregiver psychopathology (e.g., mood, personality, attention disorders)*                     | <b>0.41</b>    |                   |                    |       |                   |                                      |
| Parental separation                                                                           | <b>0.40</b>    |                   |                    |       |                   |                                      |
| Enforced family rules for smoking cigarettes                                                  | <b>-0.40</b>   |                   |                    |       |                   |                                      |
| Family legal trouble (e.g., arrests, jailtime)                                                | <b>0.38</b>    |                   | -0.30              |       |                   |                                      |
| Inability to afford necessary medical/dental visit                                            | <b>0.38</b>    |                   |                    |       |                   |                                      |
| Prenatal exposure to alcohol                                                                  | <b>0.36</b>    | -0.21             |                    |       | -0.20             |                                      |
| Parent-reported childhood trauma (e.g., accident, disaster, extreme violence)                 | <b>0.35</b>    |                   |                    |       |                   |                                      |
| Sudden death of a loved one                                                                   | <b>0.34</b>    |                   |                    |       |                   |                                      |
| Severe paternal mental health issues (e.g., breakdowns, delusions, hospitalizations)          | <b>0.33</b>    |                   |                    |       |                   |                                      |
| Prenatal exposure to caffeine                                                                 | -0.30          |                   |                    |       |                   |                                      |
| Ease of access to marijuana                                                                   | 0.30           |                   |                    |       |                   |                                      |
| Mean parental age at birth                                                                    | -0.26          |                   |                    |       |                   |                                      |
| Parent-reported family conflict                                                               | 0.20           |                   |                    |       |                   |                                      |
| Blood pressure complications at birth (e.g., Rh incompatibility, necessary blood transfusion) | 0.17           |                   |                    |       |                   |                                      |
| Traumatic brain injury                                                                        | 0.16           |                   |                    |       |                   |                                      |
| Significant family lifestyle change (e.g., move, birth of new baby)                           | 0.15           |                   |                    |       |                   |                                      |
| Severe fever during first year of life                                                        | 0.14           |                   |                    |       |                   |                                      |

|                                                                                                         |      |              |       |
|---------------------------------------------------------------------------------------------------------|------|--------------|-------|
| Bed wetting                                                                                             | 0.14 |              |       |
| Census-derived neighborhood poverty (e.g., unemployment rate, families/individuals below poverty level) |      | <b>0.68</b>  |       |
| Census-derived neighborhood population density                                                          |      | <b>0.68</b>  |       |
| Parental ability to speak English                                                                       | 0.29 | <b>-0.66</b> |       |
| Census-derived neighborhood immigration and crowding                                                    |      | <b>0.60</b>  |       |
| Census-derived neighborhood lead exposure risk                                                          |      | <b>0.51</b>  | -0.24 |
| Census-derived neighborhood walkability index                                                           |      | <b>0.51</b>  |       |
| Parent-reported neighborhood safety                                                                     |      | <b>-0.47</b> |       |
| Census-derived neighborhood air pollution (NO <sub>2</sub> ,PM <sub>2.5</sub> )                         |      | <b>0.46</b>  |       |
| Crime reports-derived crime prevalence (e.g., drug possession or sale, violent crime)                   |      | 0.29         |       |
| Blood oxygen complications during pregnancy (e.g., severe anemia)                                       |      | 0.26         |       |
| Parent-reported importance of independence and self-reliance                                            |      | 0.25         |       |
| Parent-reported interest in ethnic background and culture                                               |      | 0.22         |       |
| Census-derived neighborhood proximity to major roads                                                    |      | -0.21        |       |
| Participation in extracurricular activities (e.g., sports, crafts, hobbies)                             |      | -0.21        |       |
| Parent-reported connection to ethnic background and culture                                             |      | 0.19         |       |
| Nutrition                                                                                               |      | 0.16         |       |
| Weeks post-conception at discovery of pregnancy                                                         |      | 0.10         |       |
| Youth-reported positive school involvement                                                              |      | <b>0.59</b>  |       |
| Youth-reported acceptance and love by primary caregiver                                                 |      | <b>0.57</b>  |       |
| Youth-reported school enjoyment                                                                         |      | <b>0.57</b>  |       |
| Youth-reported racial/ethnic discrimination (past year)                                                 |      | <b>-0.57</b> |       |
| Youth-reported school grades and achievement                                                            |      | <b>0.55</b>  |       |
| Youth-reported parental monitoring and communication                                                    |      | <b>0.54</b>  |       |
| Youth-reported unfair treatment on racial/ethnic grounds (lifetime)                                     |      | <b>-0.50</b> |       |
| Youth-reported positive feedback at school                                                              |      | <b>0.49</b>  |       |
| Youth-reported acceptance and love by secondary caregiver                                               |      | <b>0.49</b>  |       |
| Youth-reported family conflict                                                                          |      | <b>-0.49</b> |       |

|                                                                                                |       |      |              |
|------------------------------------------------------------------------------------------------|-------|------|--------------|
| Youth-reported lesbian, gay, bisexual discrimination (past year)                               |       |      | <b>-0.46</b> |
| Youth-reported discrimination based on weight (past year)                                      |       |      | <b>-0.45</b> |
| Youth-reported discrimination based on being foreign (past year)                               | 0.29  |      | <b>-0.38</b> |
| Youth-reported family discordance (e.g., loss of job, mental health issues, conflict/violence) |       |      | <b>-0.34</b> |
| Youth-reported neighborhood safety                                                             | -0.25 |      | <b>0.33</b>  |
| Youth-reported exposure to serious injury, illness, death (self or other)                      |       |      | <b>-0.31</b> |
| Youth-reported exposure to mature entertainment (e.g., M-rated video games, R-rated movies)    |       |      | -0.26        |
| Youth-reported hours of screen time per day                                                    |       |      | -0.23        |
| Youth-reported ratio of good to bad life events (self-rated)                                   |       |      | 0.19         |
| State-level indicators bias against sexual orientation                                         | -0.31 |      | <b>0.89</b>  |
| State-level indicators of sexism                                                               |       |      | <b>0.80</b>  |
| State-level marijuana laws                                                                     |       |      | <b>0.77</b>  |
| State-level indicators of bias against immigrants                                              | -0.35 |      | <b>0.75</b>  |
| State-level indicators of racism                                                               |       |      | <b>0.70</b>  |
| State-level legality of medical marijuana                                                      |       |      | <b>0.67</b>  |
| Census-derived neighborhood wealth (e.g., median mortgage, rent, income)                       | -0.26 |      | <b>-0.45</b> |
| Parental bi- or multi-lingualism                                                               |       |      | -0.27        |
| Months breastfed                                                                               |       |      | -0.21        |
| Ease of access to hard drugs                                                                   |       |      | -0.17        |
| Family rules for using marijuana                                                               |       |      | <b>0.80</b>  |
| Family rules for drinking alcohol                                                              |       |      | <b>0.76</b>  |
| Family rules for smoking cigarettes                                                            |       |      | <b>0.74</b>  |
| Parent-reported importance of religion                                                         | 0.28  | 0.27 | <b>0.49</b>  |
| Parent-reported importance of coherence to the family unit                                     | 0.35  |      | <b>0.46</b>  |
| Parent-reported importance of family support                                                   | 0.27  |      | <b>0.45</b>  |
| Parent-reported importance of obligation to family                                             | 0.31  |      | <b>0.41</b>  |
| Family religiosity (e.g., attendance to religious services)                                    |       | 0.23 | <b>0.36</b>  |
| Ease of access to alcohol or tobacco                                                           |       |      | -0.26        |
| Enforced family rules for drinking alcohol                                                     |       |      | 0.20         |

|                                                                                                       |             |
|-------------------------------------------------------------------------------------------------------|-------------|
| Youth-reported ostracization from American society (lifetime)                                         | 0.18        |
| Premature birth                                                                                       | <b>0.82</b> |
| Twin brother or sister                                                                                | <b>0.78</b> |
| Blood oxygen complications at birth (e.g., jaundice, supplemental oxygen)                             | <b>0.60</b> |
| Time after birth in an incubator                                                                      | <b>0.52</b> |
| Birth by caesarian section                                                                            | <b>0.50</b> |
| Placental complications during pregnancy (e.g., previa, abruptio, persistent proteinuria)             | <b>0.46</b> |
| Blood pressure complications during pregnancy (e.g., pregnancy-related high blood pressure, diabetes) | <b>0.44</b> |
| Amount of prenatal care                                                                               | <b>0.43</b> |
| Circulation complications at birth (e.g., blue, slow heartbeat at birth)                              | <b>0.31</b> |
| Prenatal exposure to prescription medications                                                         | 0.27        |
| Developmental delay (motor/verbal)                                                                    | 0.24        |
| Prenatal exposure to prenatal vitamins                                                                | 0.21        |
| Severe illness/infection during first year of life                                                    | 0.13        |

| <u>Inter-Factor Correlations</u> |       |       |       |       |       |       |
|----------------------------------|-------|-------|-------|-------|-------|-------|
|                                  | F1    | F2    | F3    | F4    | F5    | F6    |
|                                  | 1     | 0.16  | -0.32 | 0.15  | -0.01 | 0.01  |
|                                  | 0.16  | 1     | -0.2  | 0.16  | 0.09  | -0.15 |
|                                  | -0.32 | -0.2  | 1     | -0.15 | -0.06 | -0.01 |
|                                  | 0.15  | 0.16  | -0.15 | 1     | 0.17  | 0.03  |
|                                  | -0.01 | 0.09  | -0.06 | 0.17  | 1     | 0.02  |
|                                  | 0.01  | -0.15 | -0.01 | 0.03  | 0.02  | 1     |

1138 Results of exploratory factor analysis of the final set of exposome items, using iterated target  
 1139 rotation designed to detect complex structure (cross-loadings). *Factor 1* comprises variables  
 1140 most related to household adversity, with the strongest indicators being prenatal exposure to  
 1141 tobacco and/or marijuana, alcohol-related problems affecting the ability to hold a job or stay out  
 1142 of jail, and frequent adult arguments or “fights” in the house. *Factor 2* comprises variables most  
 1143 related to neighborhood environment, with the strongest indicators being objective measures of  
 1144 neighborhood poverty and wealth disparity, neighborhood density, and parent-reported English-  
 1145 speaking ability. *Factor 3* includes variables most related to day-to-day experiences, with the  
 1146 strongest indicators being youth-reported feeling “involved” at school, youth-reported  
 1147 acceptance by primary caregiver, and youth-reported enjoyment of school. *Factor 4* is composed  
 1148 of variables most related to state-level environment, with the strongest indicators being negative  
 1149 attitudes toward persons with non-hetero sexual orientation, traditional views about the roles of

1150 women, and less permissive marijuana laws. Note that a “ruralness” aspect of *Factor 4* is evident  
1151 in the low neighborhood wealth and property values (seventh strongest indicator). *Factor 5*  
1152 comprises variables most related to family values, with the strongest indicators being the  
1153 strictness of rules related to, 1) alcohol, 2) tobacco, and 3) marijuana. *Factor 6* includes variables  
1154 most related to pregnancy and birth complications, with the strongest indicators being premature  
1155 birth, a twin birth (zygosity not specified), and the child’s needing supplemental oxygen after  
1156 birth. Inter-factor correlations are shown at the bottom of the table.

1157

1158 **Figure 2.** Exposome bifactor model of the ABCD Study

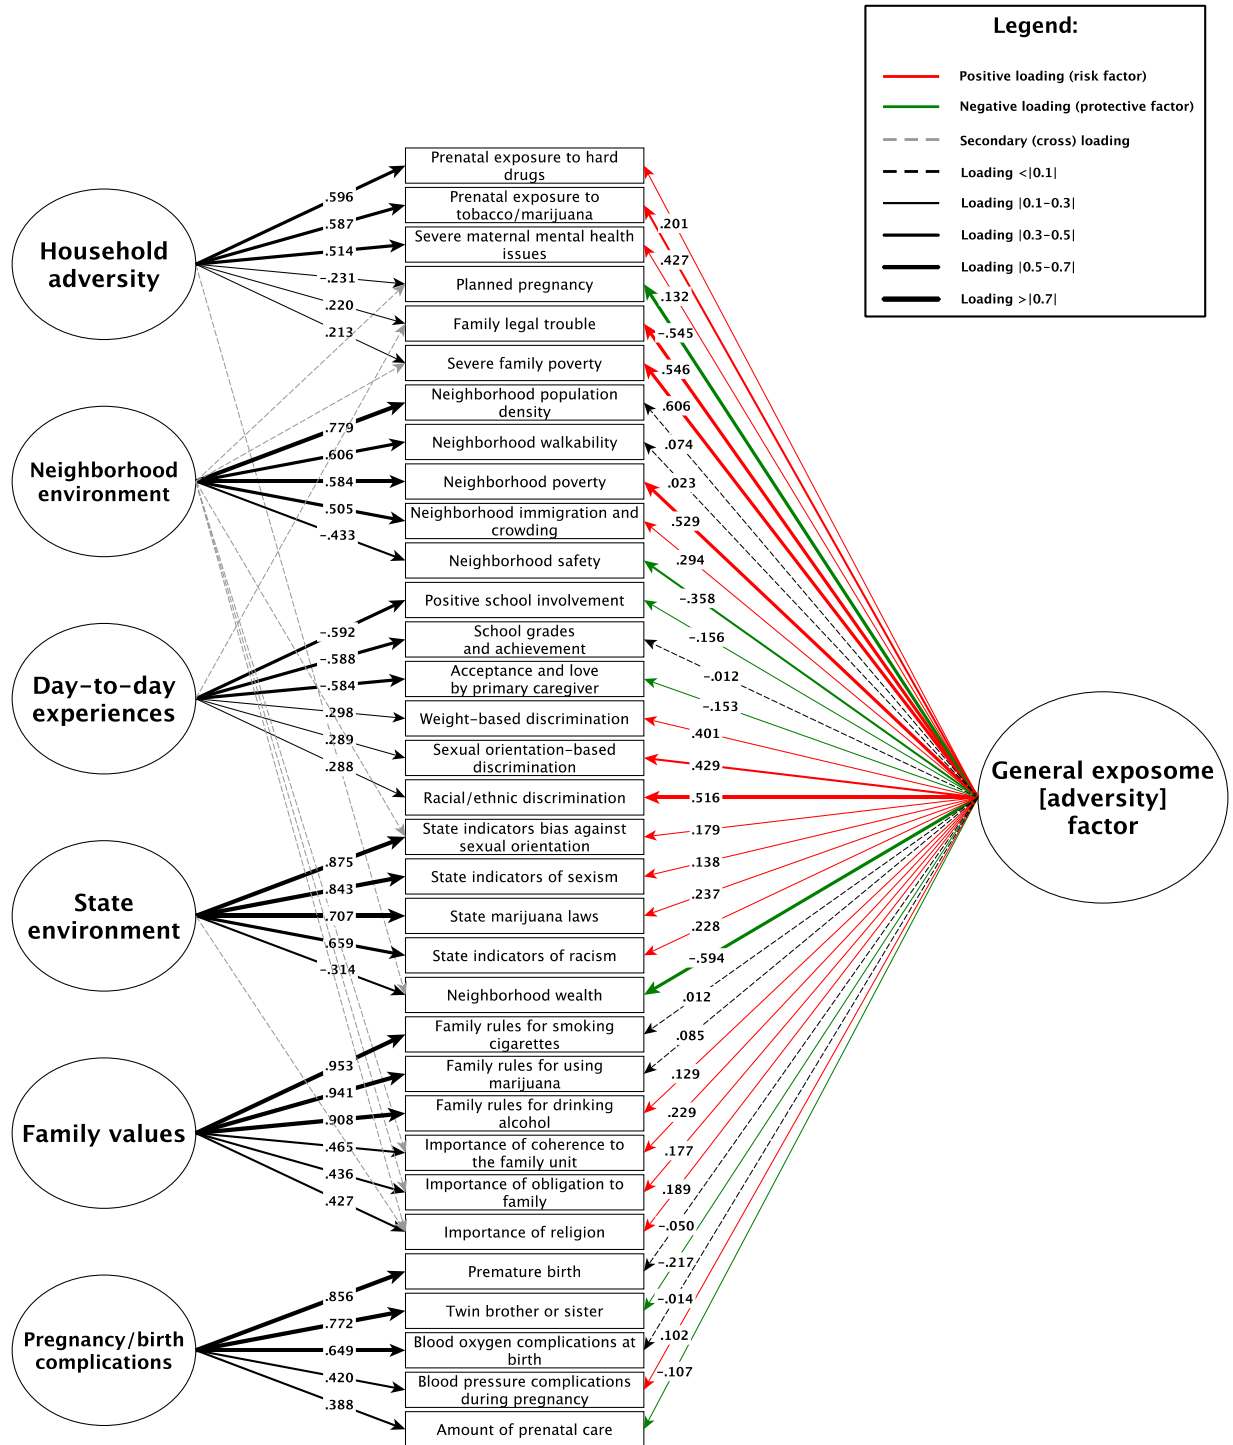

1159

1160 Bifactor model of confirmatory factor analysis. Only the top 3 items loading within-factor and on  
 1161 the *Exp-factor* are included; that is, a specific factor's indicators were included in the diagram if  
 1162 they were among the top three strongest-loading items on that specific factor *or* on the general  
 1163 factor (so maximum possible = 6 indicators per factor in the diagram). Arrow thickness relates to

1164 the strength of the loading (higher the loading, thicker the arrow). Arrow color relates to the sign  
1165 of the loading – a red arrow corresponds to positive loading (associated with a higher *Exp-factor*  
1166 score; risk factor) and a green arrow corresponds to negative loading (associated with a lower  
1167 *Exp-factor* score; protective factor). Subfactors are presented from top to bottom in order from  
1168 F1 to F6. See **Supplemental Table 12** for the full list of items and their loadings, and for the  
1169 breakdown of variables that make up each factor in the bifactor model.

1170

1171 **Figure 3.** Exposome scores across demographic comparisons in the ABCD Study

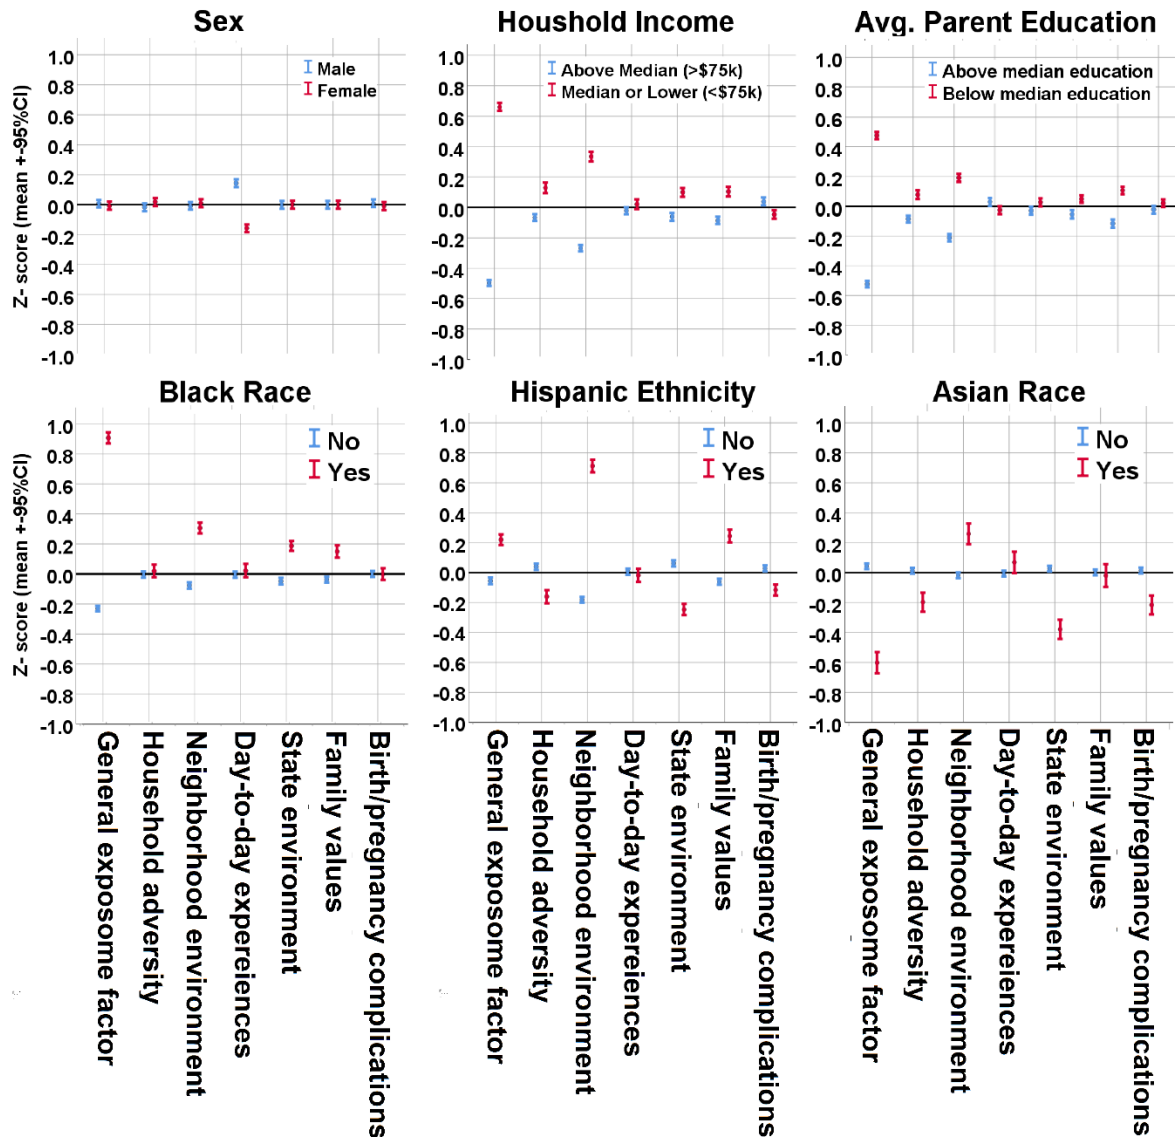

1172

1173 Exposome scores for the six orthogonal subfactors and one general factor are compared across  
1174 demographic groups. Displayed are differences between male and female participants, high and  
1175 low household income, and high and low parent education (**top panel**), Black race, Hispanic  
1176 ethnicity, and Asian race (**bottom panel**). Demographic differences serve as an initial validation  
1177 for use of generated exposome factor scores.

1178



1179 **Table 2.** Association of exposome factor scores to psychopathology *P*-factor score in the ABCD  
1180 Study

|                               | Model 1 (Demographics) |       |        | Model 2 (Demographics + Exposome) |       |        |
|-------------------------------|------------------------|-------|--------|-----------------------------------|-------|--------|
|                               | Beta                   | SE    | P      | Beta                              | SE    | P      |
| Age (months)                  | -0.009                 | 0.010 | 0.363  | 0.007                             | 0.008 | 0.383  |
| Female sex                    | -0.098                 | 0.009 | <0.001 | -0.017                            | 0.008 | 0.031  |
| White race                    | 0.020                  | 0.014 | 0.143  | -0.012                            | 0.011 | 0.277  |
| Black race                    | 0.075                  | 0.013 | <0.001 | -0.014                            | 0.011 | 0.224  |
| Asian race                    | -0.012                 | 0.008 | 0.232  | 0.001                             | 0.007 | 0.870  |
| Hispanic ethnicity            | 0.007                  | 0.010 | 0.491  | 0.033                             | 0.009 | <0.001 |
| Parent education (years)      | -0.057                 | 0.013 | <0.001 | -0.002                            | 0.011 | 0.852  |
| Household income (ordinal)    | -0.097                 | 0.013 | <0.001 | 0.035                             | 0.012 | 0.003  |
| General exposome adversity    |                        |       |        | 0.285                             | 0.011 | <0.001 |
| Household adversity           |                        |       |        | 0.083                             | 0.008 | <0.001 |
| Neighborhood environment      |                        |       |        | -0.021                            | 0.009 | 0.024  |
| Day-to-day experiences        |                        |       |        | 0.518                             | 0.008 | <0.001 |
| State environment             |                        |       |        | 0.027                             | 0.008 | 0.001  |
| Family values                 |                        |       |        | -0.019                            | 0.008 | 0.018  |
| Pregnancy/birth complications |                        |       |        | 0.014                             | 0.008 | 0.075  |
| Adjusted R <sup>2</sup>       |                        | 0.039 |        |                                   | 0.382 |        |

1181 Effect sizes (standardized betas) derived from a linear regression model testing association of  
1182 demographics and exposome factors with general psychopathology (P-factor). Abbreviations: SE  
1183 = standard error.

1184

1185 **Figure 4.** Association of exposome factor scores with obesity and pubertal development in the  
 1186 ABCD Study.

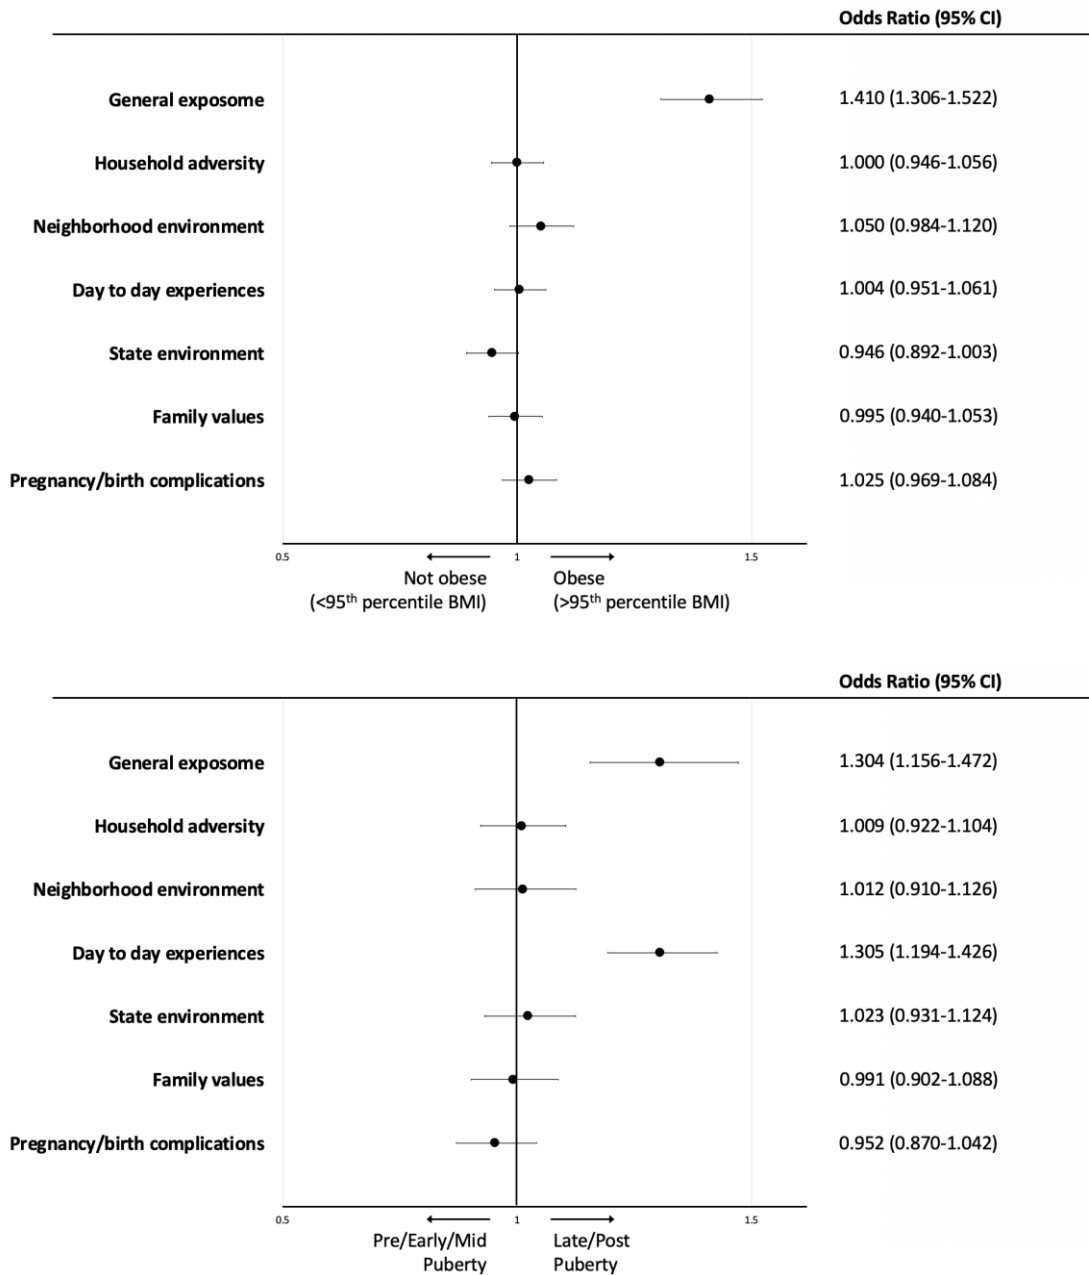

1187

1188

1189 Association of the exposome factor scores with obesity (binary variable, BMI  $\geq$  95<sup>th</sup> percentile,  
 1190 **top panel**) and late or post-pubertal stage (binary variable, contrasted against pre-, early, and  
 1191 mid-pubertal stage, **bottom panel**). Odds ratios were extracted from a binary logistic regression  
 1192 model with exposome scores as independent variables, covarying for age, sex, race (White,  
 1193 Black, Other), ethnicity (Hispanic), parent education, and household income. Puberty model also  
 1194 co-varies for BMI. Abbreviations: BMI = body mass index; 95% CI = 95% confidence interval.

1195

1196 **Table 3.** Association of exposome factor scores to psychopathology *P*-factor score in the PNC.

|                                   | Model 1 (Demographics) |           |          | Model 2 (Demographics + Exposome) |           |          |
|-----------------------------------|------------------------|-----------|----------|-----------------------------------|-----------|----------|
|                                   | <b>Beta</b>            | <b>SE</b> | <b>P</b> | <b>Beta</b>                       | <b>SE</b> | <b>P</b> |
| <b>Age (months)</b>               | 0.029                  | 0.02      | 0.05     | -0.024                            | 0.02      | 0.085    |
| <b>Female sex</b>                 | -0.038                 | 0.019     | 0.01     | -0.025                            | 0.013     | 0.064    |
| <b>White race</b>                 | -0.120                 | 0.026     | <0.001   | -0.067                            | 0.024     | 0.006    |
| <b>Black race</b>                 | 0.009                  | 0.028     | 0.736    | -0.012                            | 0.025     | 0.640    |
| <b>Hispanic ethnicity</b>         | -0.021                 | 0.017     | 0.217    | -0.009                            | 0.016     | 0.575    |
| <b>Parent education (years)</b>   | -0.108                 | 0.015     | <0.001   | -0.046                            | 0.015     | 0.003    |
| <b>General exposome adversity</b> |                        |           |          | 0.150                             | 0.020     | <0.001   |
| <b>Household adversity</b>        |                        |           |          | 0.139                             | 0.014     | <0.001   |
| <b>Neighborhood environment</b>   |                        |           |          | 0.025                             | 0.014     | 0.072    |
| <b>Trauma exposure</b>            |                        |           |          | 0.314                             | 0.018     | <0.001   |
| <b>Early life</b>                 |                        |           |          | 0.091                             | 0.014     | <0.001   |
| <b>Adjusted R<sup>2</sup></b>     | 0.039                  |           |          | 0.184                             |           |          |

1197 Effect sizes (standardized betas) derived from a linear regression model testing association of  
 1198 demographics and exposome factors with general psychopathology (P-factor). Abbreviations:  
 1199 PNC= Philadelphia Neurodevelopmental Cohort. SE = standard error.

1200

1201 **Figure 5.** Association of exposome factor scores with obesity and pubertal development in the  
1202 PNC.

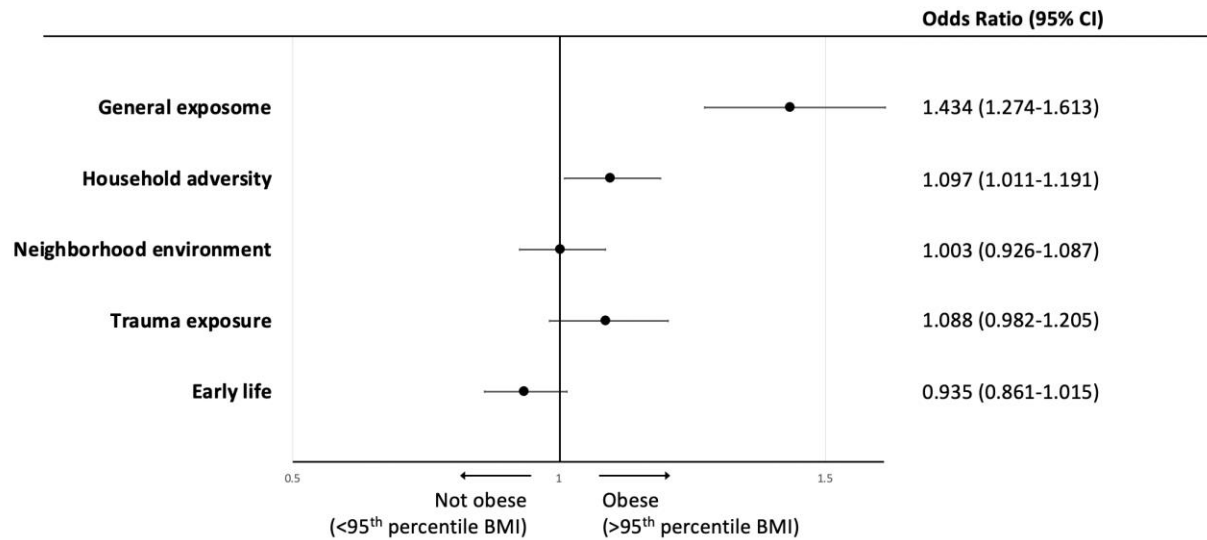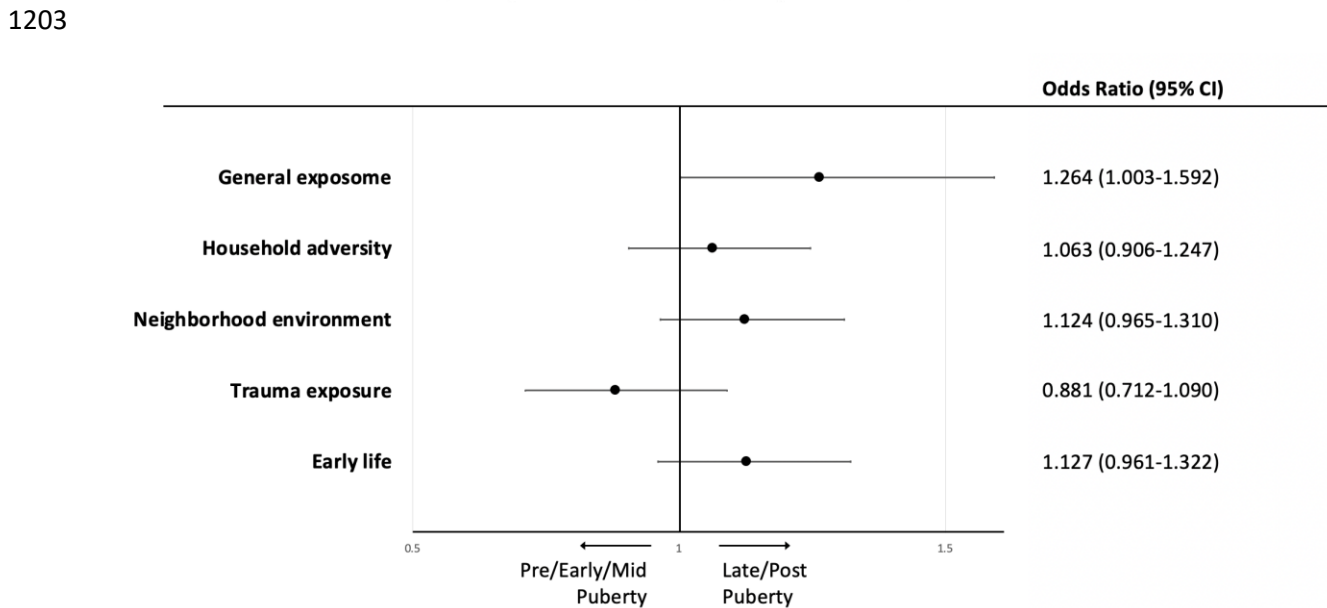

1204  
1205 Association of the PNC exposome factor scores with obesity (binary variable, BMI $\geq$ 95<sup>th</sup>  
1206 percentile, **top panel**) and late or post-pubertal stage (binary variable, contrasted against pre-,  
1207 early, and mid-pubertal stage, **bottom panel**). Odds ratios were extracted from a binary logistic  
1208 regression model with exposome scores as independent variables, covarying for age, sex, race  
1209 (White, Black, Other), ethnicity (Hispanic), and parent education. Puberty model also co-varies  
1210 for BMI. For models testing associations with pubertal measures, the PNC sample was limited to  
1211 age range 10-12 to minimize age effects on models. Sample included N=1,496, of whom 271  
1212 were at late/post pubertal status.

1213 Abbreviations: BMI = body mass index; 95% CI = 95% confidence interval.

1214 **Table 4.** Association of the general exposome factor score with health measures in ABCD Study  
1215 and PNC using identical co-variates in both cohorts (age, sex, race, ethnicity, parental  
1216 education).

| Cohort           | Dependent variable | Standardized Beta | 95%CI     | P      |
|------------------|--------------------|-------------------|-----------|--------|
| ABCD             | P-factor           | 0.28              | 0.26-3    | <0.001 |
| PNC              | P-factor           | 0.15              | 0.11-0.19 | <0.001 |
| ABCD             | BMI                | 0.16              | 0.14-0.18 | <0.001 |
| PNC              | BMI                | 0.15              | 0.1-0.19  | <0.001 |
| Cohort           | Dependent variable | Odds Ratio        | 95%CI     | P      |
| ABCD             | Depression         | 1.61              | 1.44-1.80 | <0.001 |
| PNC              | Depression         | 1.28              | 1.06-1.46 | 0.012  |
| ABCD             | ADHD               | 1.35              | 1.27-1.43 | <0.001 |
| PNC              | ADHD               | 1.17              | 1.05-1.3  | 0.005  |
| ABCD             | Obesity            | 1.43              | 1.34-1.53 | <0.001 |
| PNC              | Obesity            | 1.43              | 1.27-1.61 | <0.001 |
| ABCD             | Late/post pubertal | 1.37              | 1.23-1.52 | <0.001 |
| PNC <sup>a</sup> | Late/post pubertal | 1.26              | 1-1.59    | 0.047  |

1217 Effect sizes derived from a linear regression model (standardized betas for continuous and odds  
1218 ratio for binary measures) testing associations of the general exposome factor score with various  
1219 health and mental health variables. Abbreviations: ABCD= Adolescent Brain Cognitive  
1220 Development Study; PNC= Philadelphia Neurodevelopmental Cohort; BMI= Body mass index;  
1221 ADHD= Attention deficit hyperactivity disorder.

1222 <sup>a</sup>For the models in PNC testing associations with pubertal development status we included  
1223 participants ages 10-12 (n=1,496).

1224
